# Supplementary material for: Potential energy surfaces for singlet and triplet states of the LiH2+ system and quasi-classical trajectory cross sections for H + LiH+ and H+ + LiH
Source: Royal Society of Chemistry journal article supplement (doi:10.1039/d3cp02959j), 2023-01-01
Supplement: d3cp02959j1.pdf [file d3cp02959j1.pdf]

# Potential energy surfaces for singlet and triplet states of the $\text{LiH}_2^+$ system and quasi-classical trajectory study on the $\text{H} + \text{LiH}^+$ and $\text{H}^+ + \text{LiH}$ reactions

Javier Hernández,<sup>1,2</sup> Cristina Sanz,<sup>1</sup> Pedro Alberto Enríquez,<sup>3</sup>

Miguel González<sup>4,\*</sup> and Miguel Paniagua<sup>1,\*</sup>

<sup>1</sup> Dept. de Química Física Aplicada, Univ. Autónoma de Madrid, Cantoblanco, Spain

<sup>2</sup> Depto. de Química Física, Univ. de Salamanca, Spain

<sup>3</sup> Dept. de Química, Univ. de La Rioja, Logroño, Spain

<sup>4</sup> Dept. de Ciència de Materials i Química Física and IQTC, Univ. de Barcelona, Barcelona, Spain

## Supplementary Information

**Table S1.** Exoergicity of  $\text{LiH}^+(\text{X}^2\Sigma^+) + \text{H}(^2\text{S}) \rightarrow \text{Li}^+(^1\text{S}) + \text{H}_2(\text{X}^1\Sigma_g^+)$  and  $\text{LiH}(\text{X}^1\Sigma^+) + \text{H}^+ \rightarrow \text{Li}(^2\text{S}) + \text{H}_2^+(\text{X}^2\Sigma_g^+)$ . Comparison with the previous results. Page 4.

**Table S2.** Stationary point [T-shape ( $\text{C}_{2v}$ ) minimum] of the  $1^1\text{A}'$  ground PES. Comparison with the previous results. Page 4.

**Table S3.** Stationary point [Li-H---H collinear ( $\text{C}_{\infty v}$ ) minimum 1] of the  $2^1\text{A}'$  excited PES. Comparison with the previous results. Page 5.

**Table S4.** Stationary point [Li---H-H collinear ( $\text{C}_{\infty v}$ ) minimum 2] of the  $2^1\text{A}'$  excited PES. Comparison with the previous results. Page 5.

**Table S5.** Stationary point [Li---H---H collinear ( $\text{C}_{\infty v}$ ) transition state] of the  $2^1\text{A}'$  excited PES. Comparison with the previous results. Page 6.

**Figure S1.** Equipotential contour plots of the ground  $1^1A'$  PES as a function of the internal distances,  $r_{HH}$  and  $r_{LiH}$  and the angle between them indicated at the top of each panel. The zero energy corresponds to the separated atoms/ions limit. Page 7.

**Figure S2.** Same as in Figure 1 but for the excited  $2^1A'$  PES. Page 8.

**Figure S3.** Same as in Figure 1 but for the excited  $1^1A''$  PES. Page 9.

**Figure S4.** Same as in Figure 1 but for the excited  $1^3A'$  PES. Page 10.

**Figure S5.** Same as in Figure 1 but for the excited  $2^3A'$  PES. Page 11.

**Figure S6.** Same as in Figure 1 but for the excited  $1^3A''$  PES. Page 12.

**Figure S7.** Cross sections for the reactions on the ground  $1^1A'$  PES. Page 13.

**Figure S8.** Cross sections for the reactions on the excited  $2^1A'$  PES. Page 14.

**Figure S9.** Cross sections for the reactions on the excited  $1^1A''$  PES. Page 15.

**Figure S10.** Cross sections for the reactions on the excited  $1^3A'$  PES. Page 16.

**Figure S11.** Cross sections for the reactions on the excited  $1^3A''$  PES. Page 17.

**Figure S12.** Schematic representation of the minimum energy paths for the exchange reaction channel of the six PESs considered. Page 18.

**Figure S13.** A more detailed view of the minimum energy paths for the exchange reaction channel of the  $1^1A'$  and  $1^3A'$  PESs. Page 19.

**References.** Page 20.

**Fortran code 1.** Analytical expression of the ground  $1^1A'$  PES. Page 21.

**Fortran code 2.** Analytical expression of the excited  $2^1A'$  PES. Page 26.

**Fortran code 3.** Analytical expression of the excited  $1^1A''$  PES. Page 33.

**Fortran code 4.** Analytical expression of the excited  $1^3A'$  PES. Page 38.

**Fortran code 5.** Analytical expression of the excited  $2^3A'$  PES. Page 44.

**Fortran code 6.** Analytical expression of the excited  $1^3A''$  PES. Page 49.

**Table S1.** Exoergicity of  $\text{LiH}^+(\text{X}^2\Sigma^+) + \text{H}(\text{S}) \rightarrow \text{Li}^+(\text{S}) + \text{H}_2(\text{X}^1\Sigma_g^+)$  (reverse of reaction (1)) and  $\text{LiH}(\text{X}^1\Sigma^+) + \text{H}^+ \rightarrow \text{Li}(\text{S}) + \text{H}_2^+(\text{X}^2\Sigma_g^+)$  (reverse of reaction (2)), that take place on the  $1^1\text{A}'$  and  $2^1\text{A}''$  PESs, respectively. Comparison with the previous results.

| Result                                 | Exoergicity reverse of react. (1) (eV) | Exoergicity reverse of react. (2) (eV) |
|----------------------------------------|----------------------------------------|----------------------------------------|
| MRVB, <sup>a</sup><br>MRCI<br>(Ref. 1) | 4.6091                                 | 0.27230                                |
| MRCI<br>(Ref. 2)                       | 4.5883                                 | 0.299                                  |
| MRCI<br>(Ref. 3)                       | 4.5998                                 | 0.20220 <sup>b</sup>                   |
| MRCI<br>Present work                   | 4.608                                  | 0.274                                  |

<sup>a</sup> Multireference Valence Bond.

<sup>b</sup> The lower value observed for ref. 3 arises from the larger value obtained for the  $D_e$  of  $\text{LiH}(\text{X}^1\Sigma^+)$ , that is 0.0744 eV larger than the experimental value.

**Table S2.** Stationary point [T-shape ( $C_{2v}$ ) minimum] of the  $1^1\text{A}'$  ground potential energy surface. Comparison with the previous results (the energy is given relative to  $\text{Li}^+(\text{S}) + \text{H}_2(\text{X}^1\Sigma_g^+)$ ).<sup>a</sup>

| Result                 | $R_{\text{HH}}$ (Å) | $R_{\text{LiH}}$ (Å) | (H-Li-H) <sup>+</sup> angle (deg) | Energy (eV) |
|------------------------|---------------------|----------------------|-----------------------------------|-------------|
| CI (Ref. 4)            | 0.751               | 2.0426               | 21.2                              | -0.258      |
| MRVB, MRCI<br>(Ref. 1) | 0.7514              | 1.952                | 22.19                             | -0.286      |
| MRCI (Ref. 2)          | 0.7503              | 2.0221               | 21.38                             | -0.267      |
| MRCI (Ref. 3)          | 0.751               | 2.0271               | 21.35                             | -0.266      |
| MRCI<br>Present work   | 0.746               | 2.045                | 21.02                             | -0.268      |

<sup>a</sup>This minimum is located in the  $\text{Li}^+(\text{S}) + \text{H}_2(\text{X}^1\Sigma_g^+)$  region of the PES.

**Table S3.** Stationary point [Li-H---H collinear ( $C_{\infty v}$ ) minimum 1] of the  $2^1A'$  excited potential energy surface. Comparison with the previous results (the energy is given relative to  $LiH(X^1\Sigma^+) + H^+$ ).<sup>a</sup>

| Result              | $R_{HH}$ (Å) | $R_{LiH}$ (Å) | Energy (eV) |
|---------------------|--------------|---------------|-------------|
| MRVB, MRCI (Ref. 1) | 2.498        | 1.656         | -1.315      |
| MRCI (Ref. 2)       | 2.517        | 1.645         | -1.290      |
| MRCI (Ref. 3)       | 2.517        | 1.615         | -1.292      |
| MRCI Present work   | 2.513        | 1.646         | -1.282      |

<sup>a</sup>This minimum is located in the  $LiH(X^1\Sigma^+) + H^+$  region of the PES.

**Table S4.** Stationary point [Li---H-H collinear ( $C_{\infty v}$ ) minimum 2] of the  $2^1A'$  excited potential energy surface. Comparison with the previous results (the energy is given relative to  $Li(^2S) + H_2^+(X^2\Sigma_g^+)$ ).<sup>a</sup>

| Result              | $R_{HH}$ (Å) | $R_{LiH}$ (Å) | Energy (eV) |
|---------------------|--------------|---------------|-------------|
| MRVB, MRCI (Ref. 1) | 1.006        | 3.695         | -0.585      |
| MRCI (Ref. 2)       | 1.062        | 3.529         | -0.534      |
| MRCI (Ref. 3)       | 1.064        | 3.494         | -0.547      |
| MRCI Present work   | 1.065        | 3.559         | -0.532      |

<sup>a</sup>This minimum is located in the  $Li(^2S) + H_2^+(X^2\Sigma_g^+)$  region of the PES.

**Table S5.** Stationary point [Li---H---H collinear ( $C_{\infty v}$ ) transition state] of the  $2^1A'$  excited potential energy surface. Comparison with the previous results (the energy is given relative to the Li-H---H collinear ( $C_{\infty v}$ ) minimum 1).

| Result              | $R_{HH}$ (Å) | $R_{LiH}$ (Å) | Energy (eV) |
|---------------------|--------------|---------------|-------------|
| MRVB, MRCI (Ref. 1) | 1.600        | 2.588         | 1.088       |
| MRCI (Ref. 2)       | 1.597        | 2.552         | 1.057       |
| MRCI (Ref. 3)       | 1.614        | 2.558         | 1.104       |
| MRCI Present work   | 1.627        | 2.591         | 1.077       |

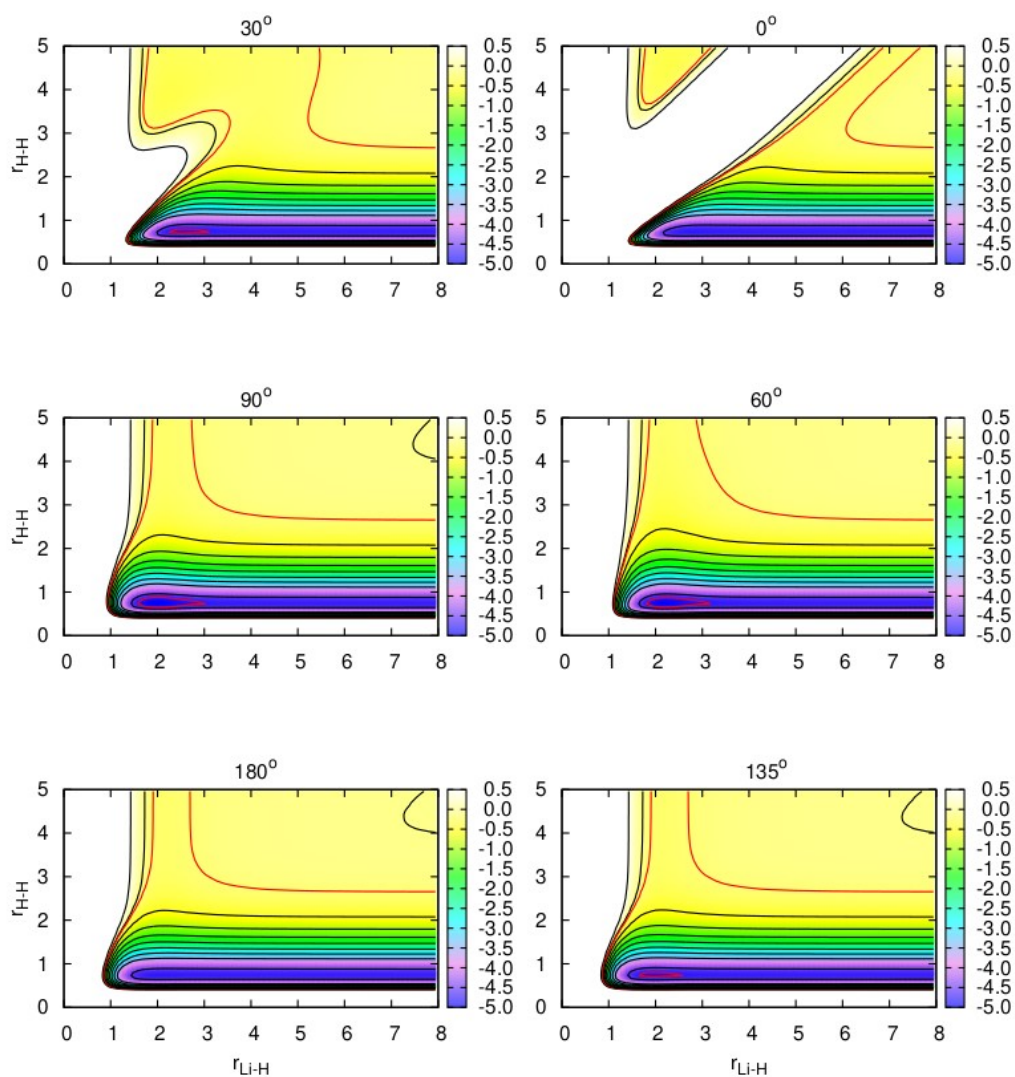

**Figure S1.** Equipotential contour plots of the ground  $1^1A'$  PES as a function of the internal distances,  $r_{HH}$  and  $r_{LiH}$  and the angle between them indicated at the top of each panel. The contour energies are indicated at the right of each panel in eV, zero energy, 0 eV, corresponds to the separated atoms/ions limit in their ground states [ $Li^+(^1S)$ ,  $H(^2S)$ ,  $H(^2S)$ ], and all distances are in Å. The contours are spaced by 0.5 eV, besides, the contour levels -0.1 eV and -4.8 eV (in red color) are also included for comparison with Figure 1 of ref. 3.



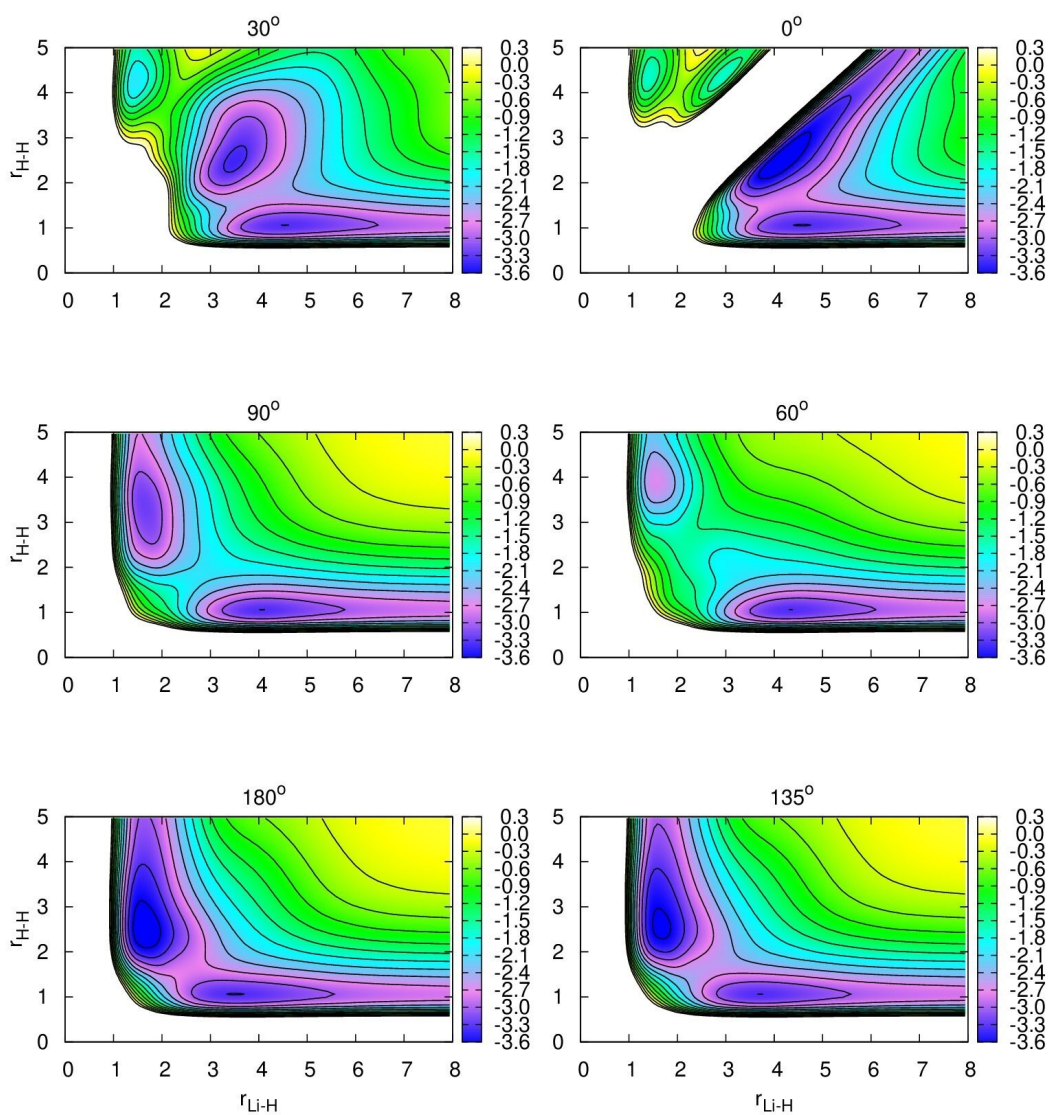

**Figure S2.** Same comments as in Figure S1 but for the excited  $2^1A'$  PES. Here the zero energy corresponds to the separated atoms/ions limit:  $\text{Li}(^2S)$ ,  $\text{H}(^2S)$ ,  $\text{H}^+$ . The contours are spaced by 0.3 eV, besides, the contour level -3.0 eV (in red color) is also included for comparison with Figure 2 of ref. 3.

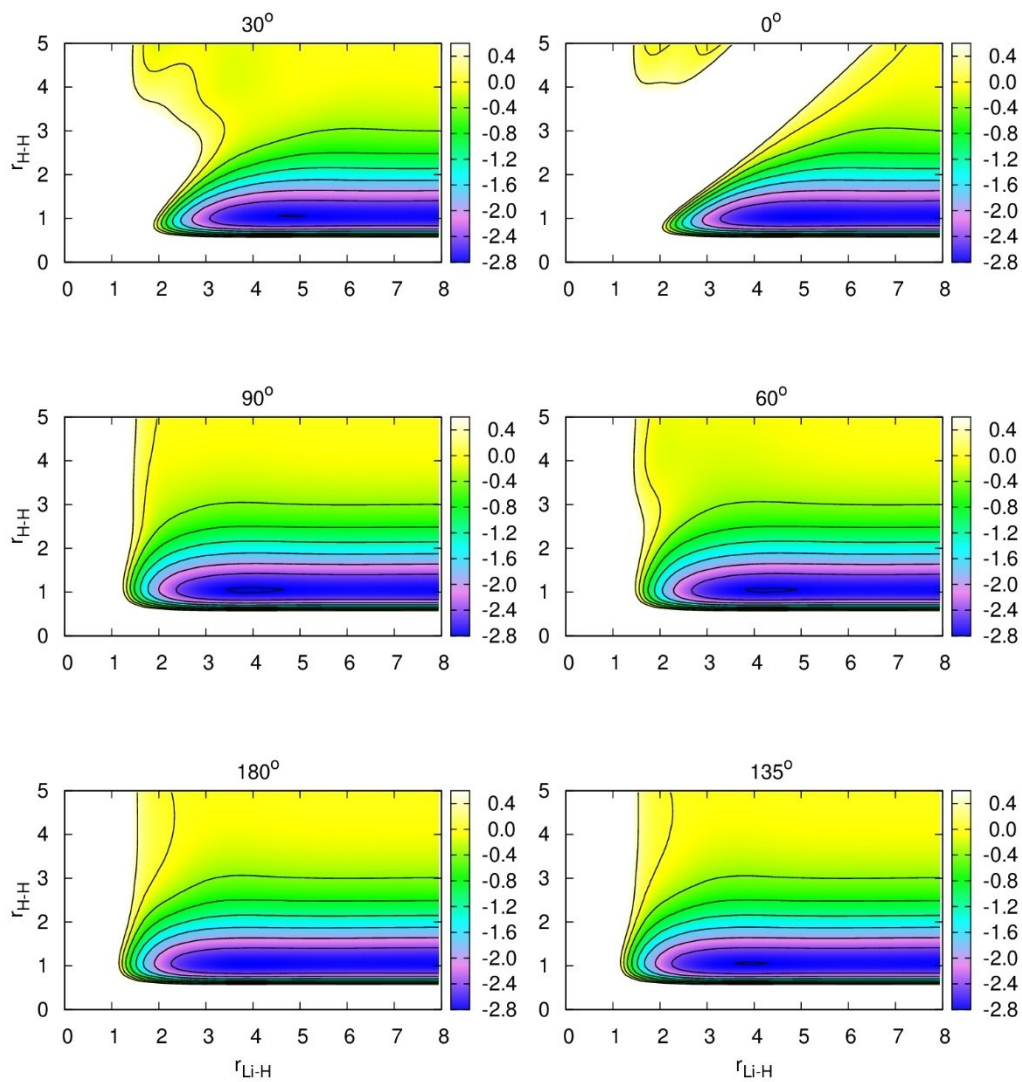

**Figure S3.** Same comments as in Figure S1 but for the excited  $1^1A''$  PES. Here the zero energy corresponds to the separated atoms/ions limit:  $Li(^2P)$ ,  $H(^2S)$ ,  $H^+$ .

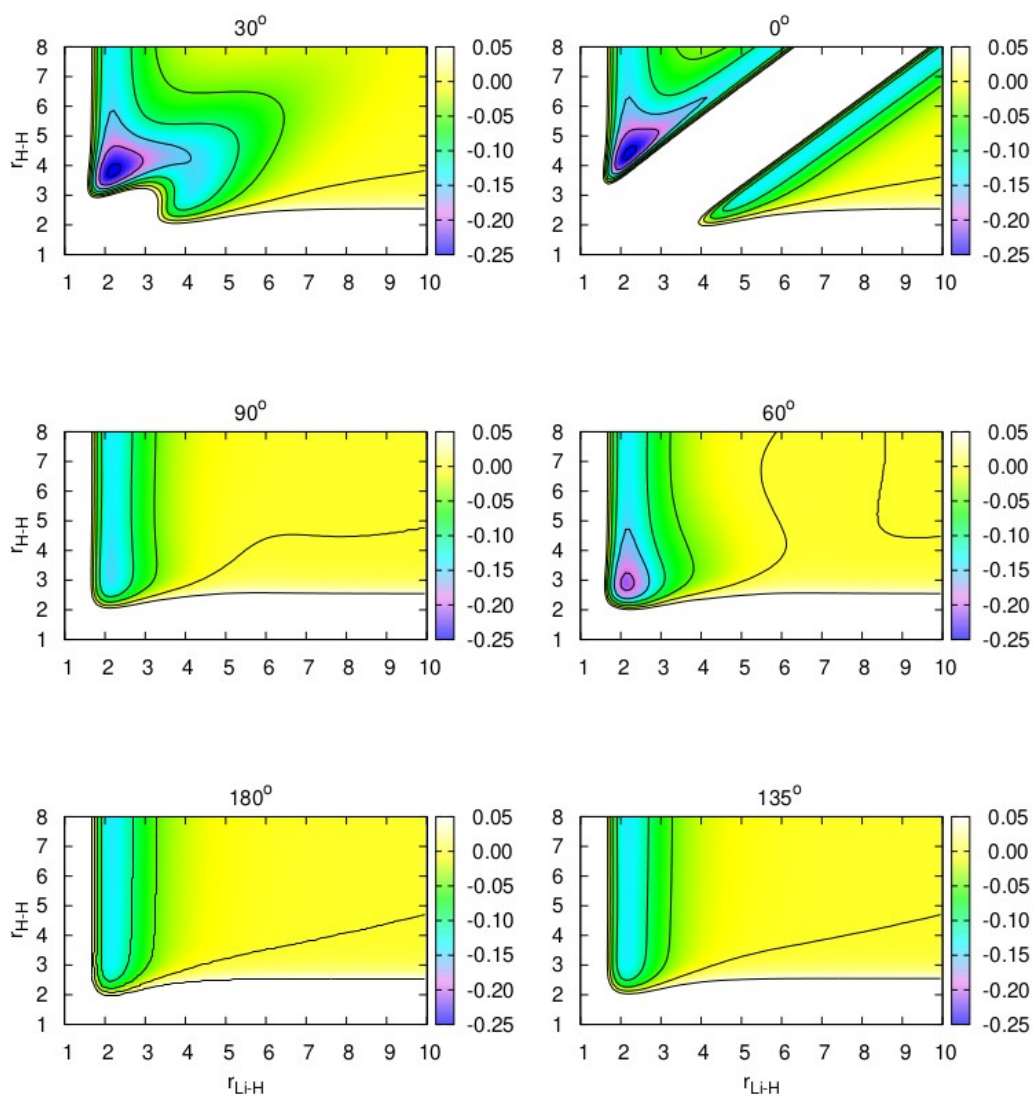

**Figure S4.** Same comments as in Figure S1 but for the excited  $1^3A'$  PES. Here, as for the ground state  $1^1A'$ , the zero energy corresponds to the separated atoms/ions limit in their ground states [ $\text{Li}^+(^1S)$ ,  $\text{H}(^2S)$ ,  $\text{H}(^2S)$ ].

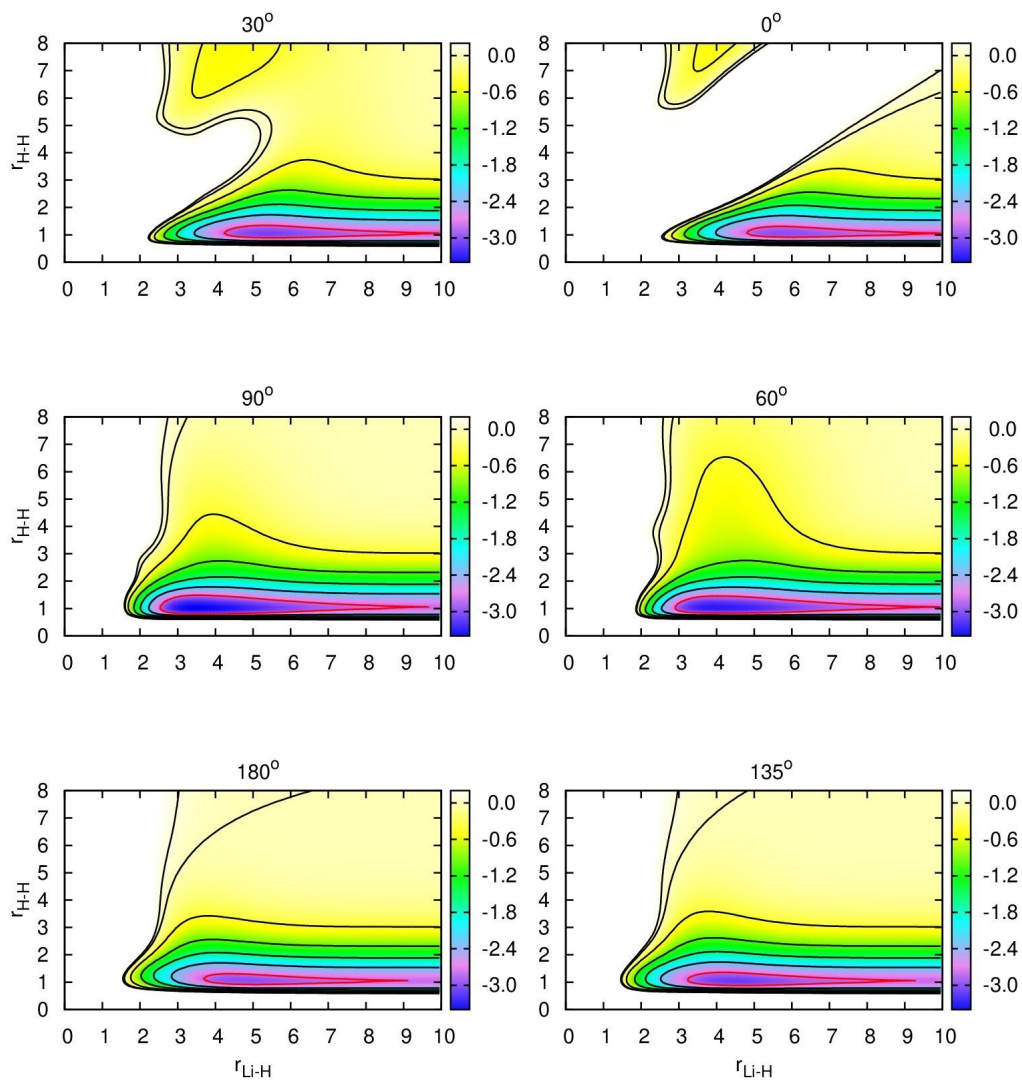

**Figure S5.** Same comments as in Figure S1 but for the excited  $2^3A'$  PES. Here, as for the excited state  $2^1A'$ , the zero energy corresponds to the separated atoms/ions limit:  $\text{Li}(^2S)$ ,  $\text{H}(^2S)$ ,  $\text{H}^+$ .

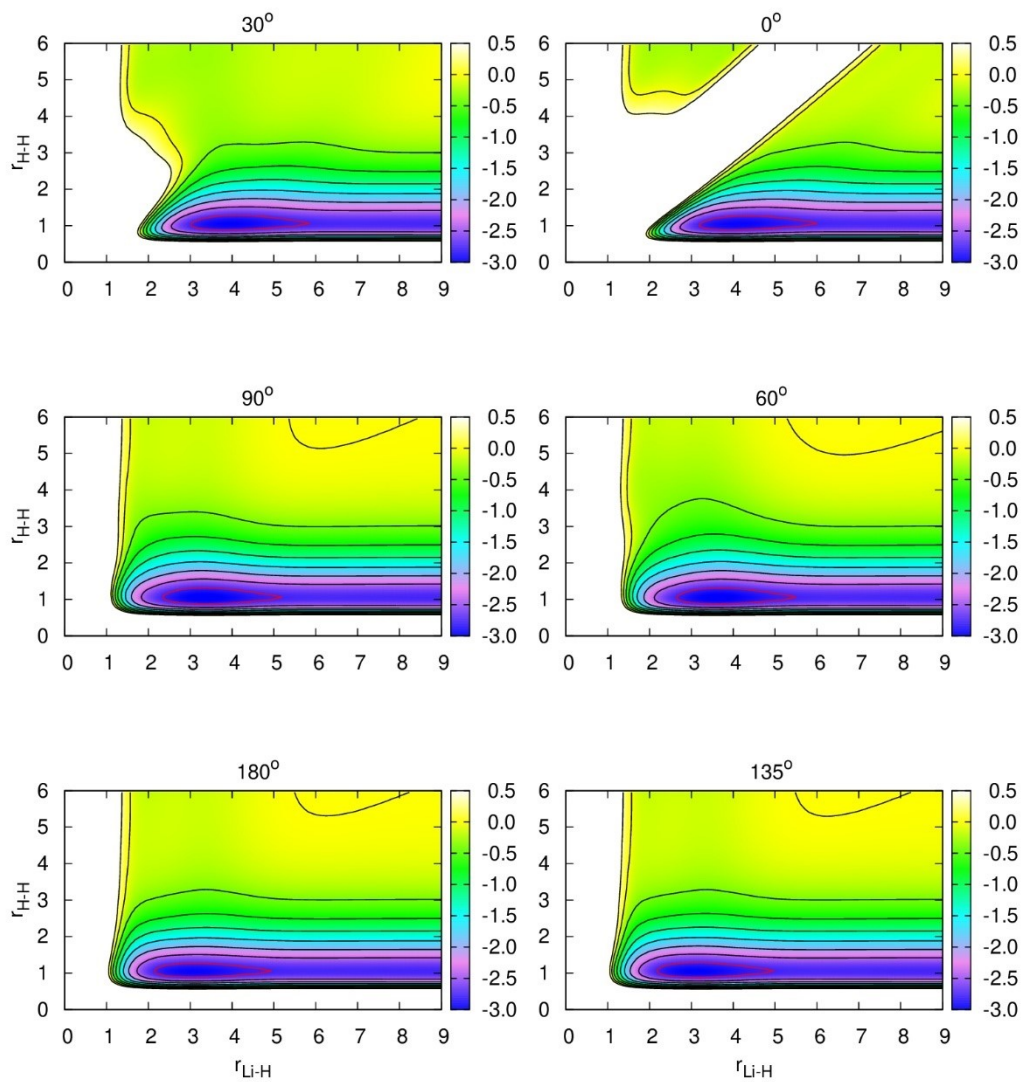

**Figure S6.** Same comments as in Figure S1 but for the excited  $1^3A''$  PES. Here, as for the excited state  $1^1A''$ , the zero energy corresponds to the separated atoms/ions limit:  $Li(^2P)$ ,  $H(^2S)$ ,  $H^+$ .

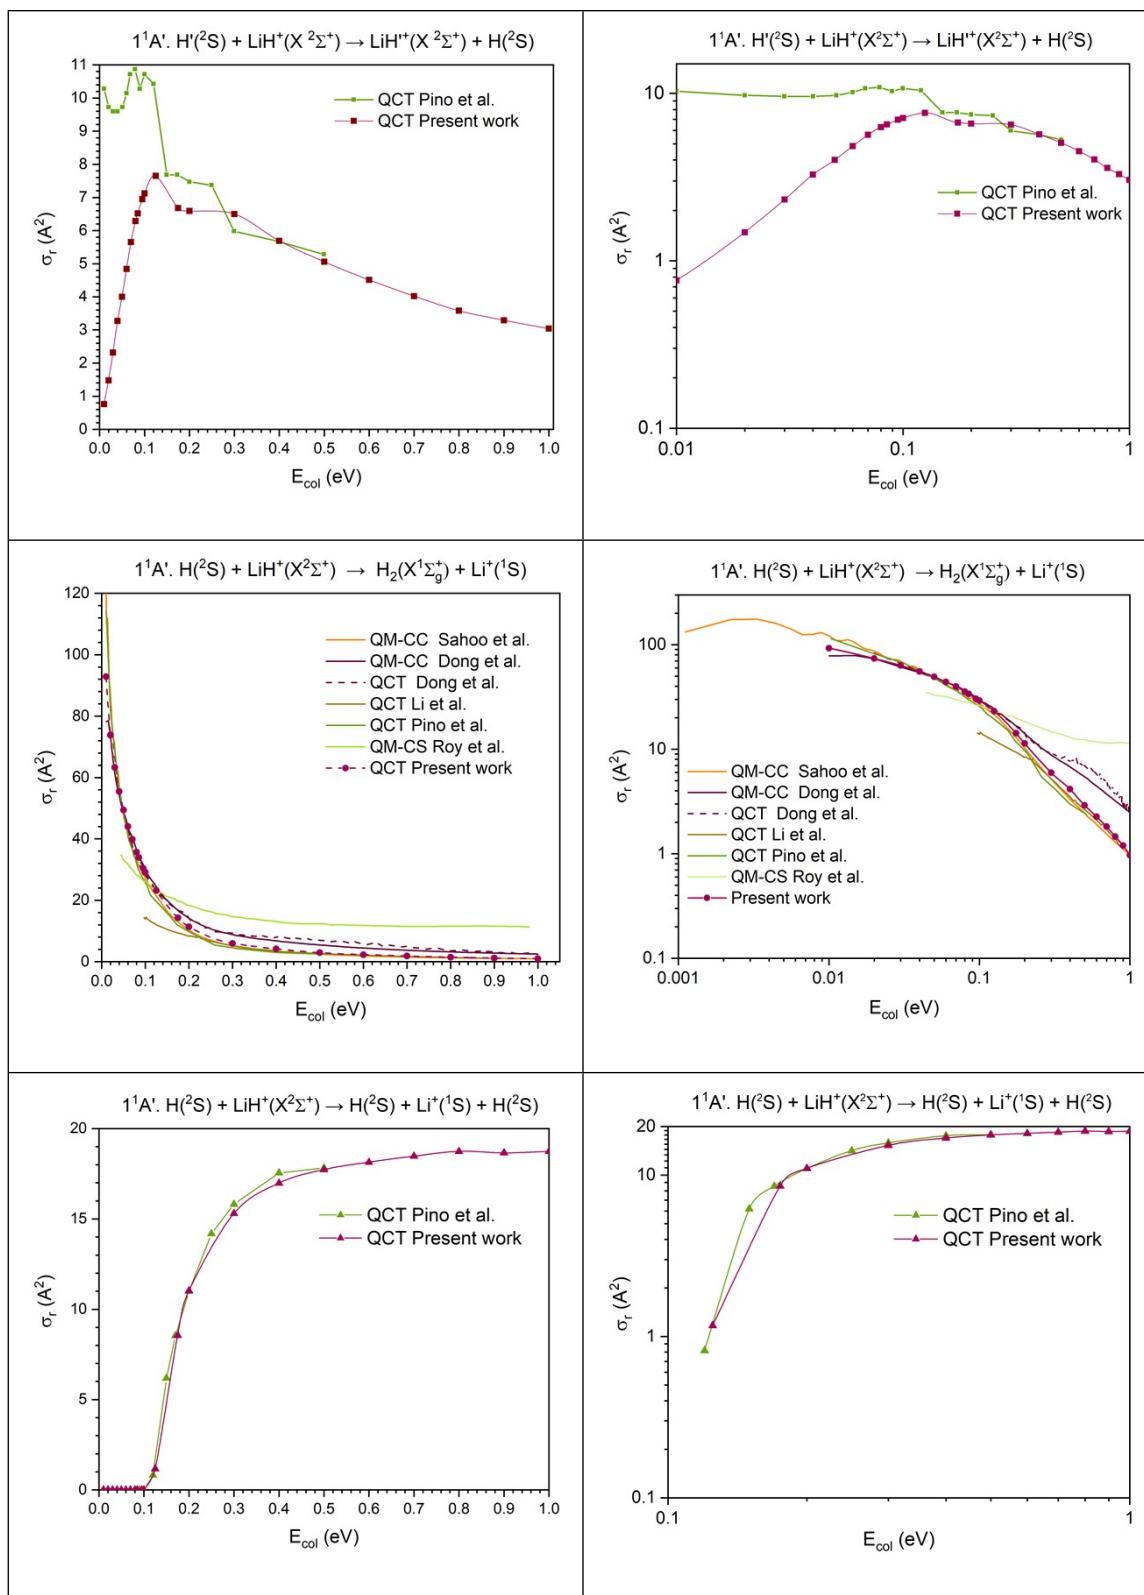

**Figure S7.** Cross sections for the reactions on the ground  $1^1A'$  PES and comparison with other theoretical results (refs. 5-9): exchange (top), H atom transfer (middle) and collision induced dissociation (bottom). The double logarithmic representation is given on the right column.

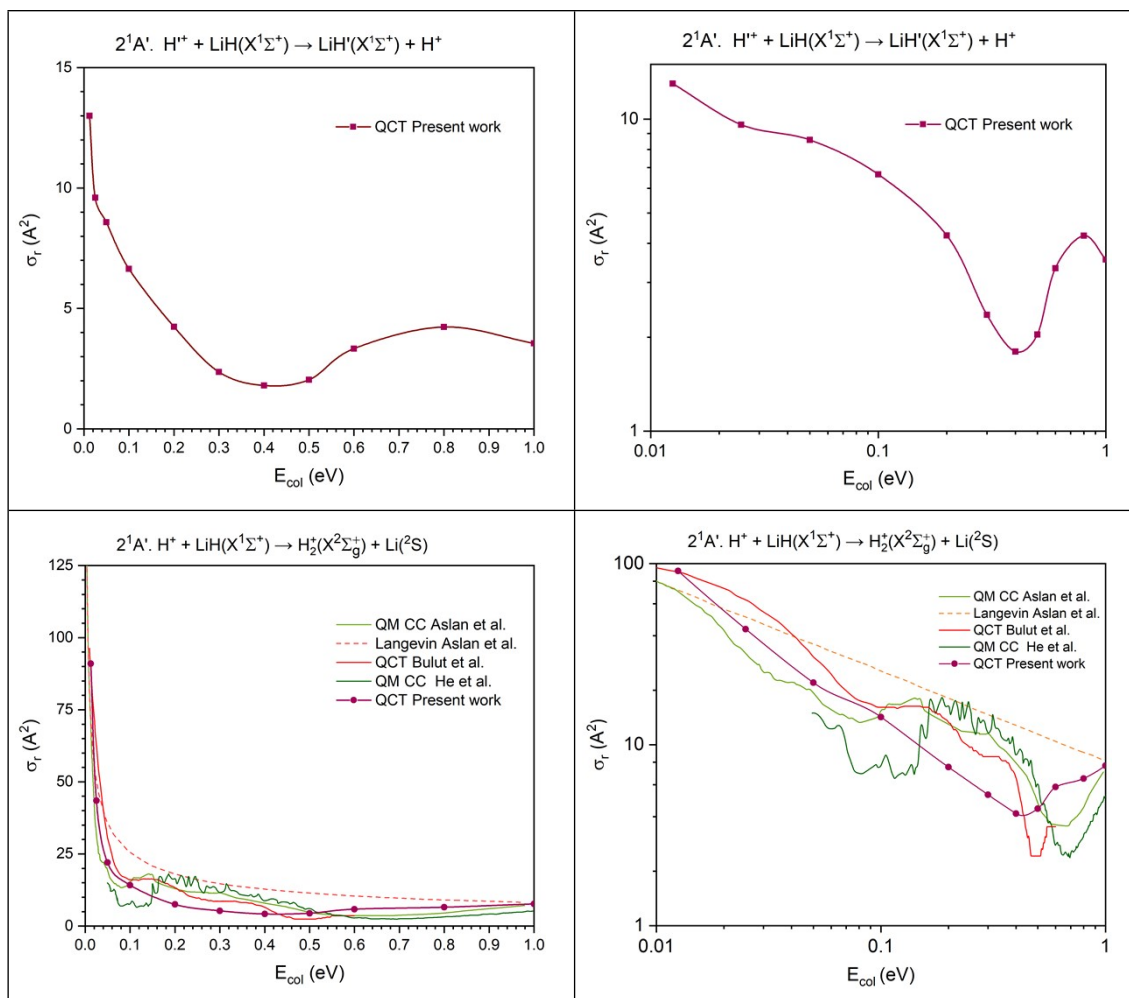

**Figure S8.** Cross sections for the reactions on the excited  $2^1A'$  PES and comparison with other theoretical results (refs. 3, 10, 11): exchange (top) and H atom transfer (bottom). The double logarithmic representation is given on the right column.

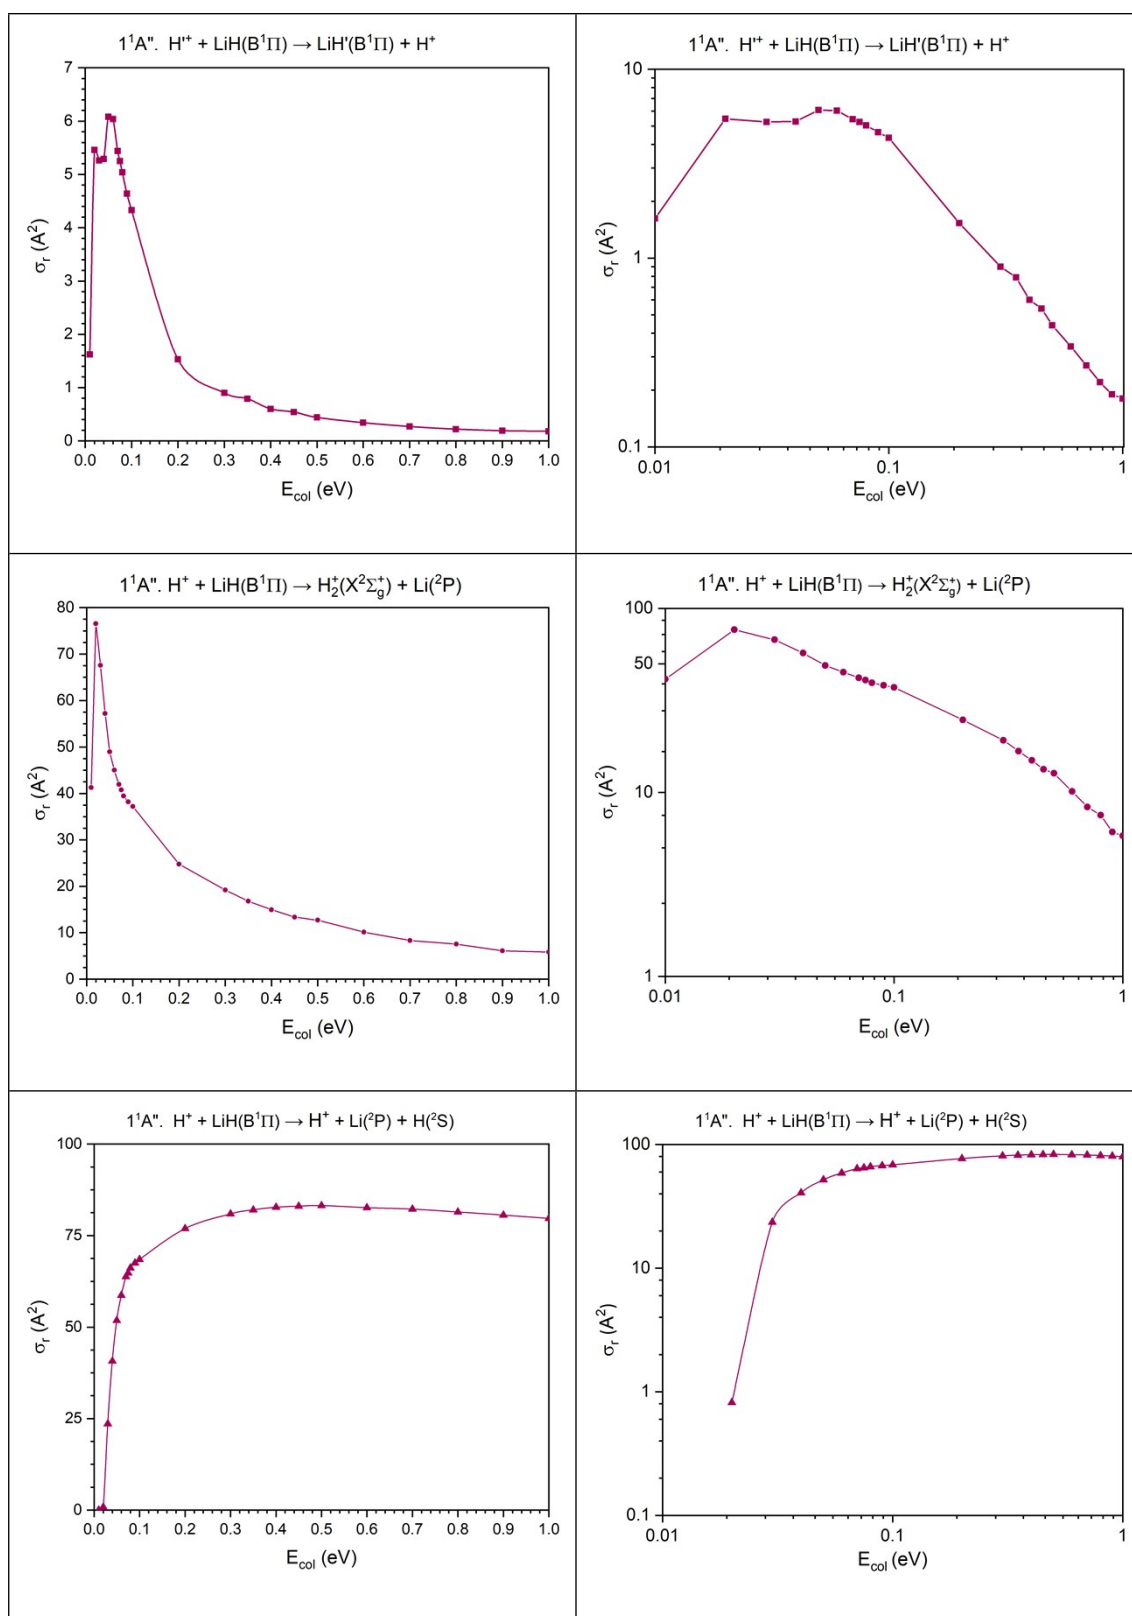

**Figure S9.** Cross sections for the reactions on the excited  $1^1A''$  PES: exchange (top), H atom transfer (middle) and collision induced dissociation (bottom). The double logarithmic representation is given on the right column.



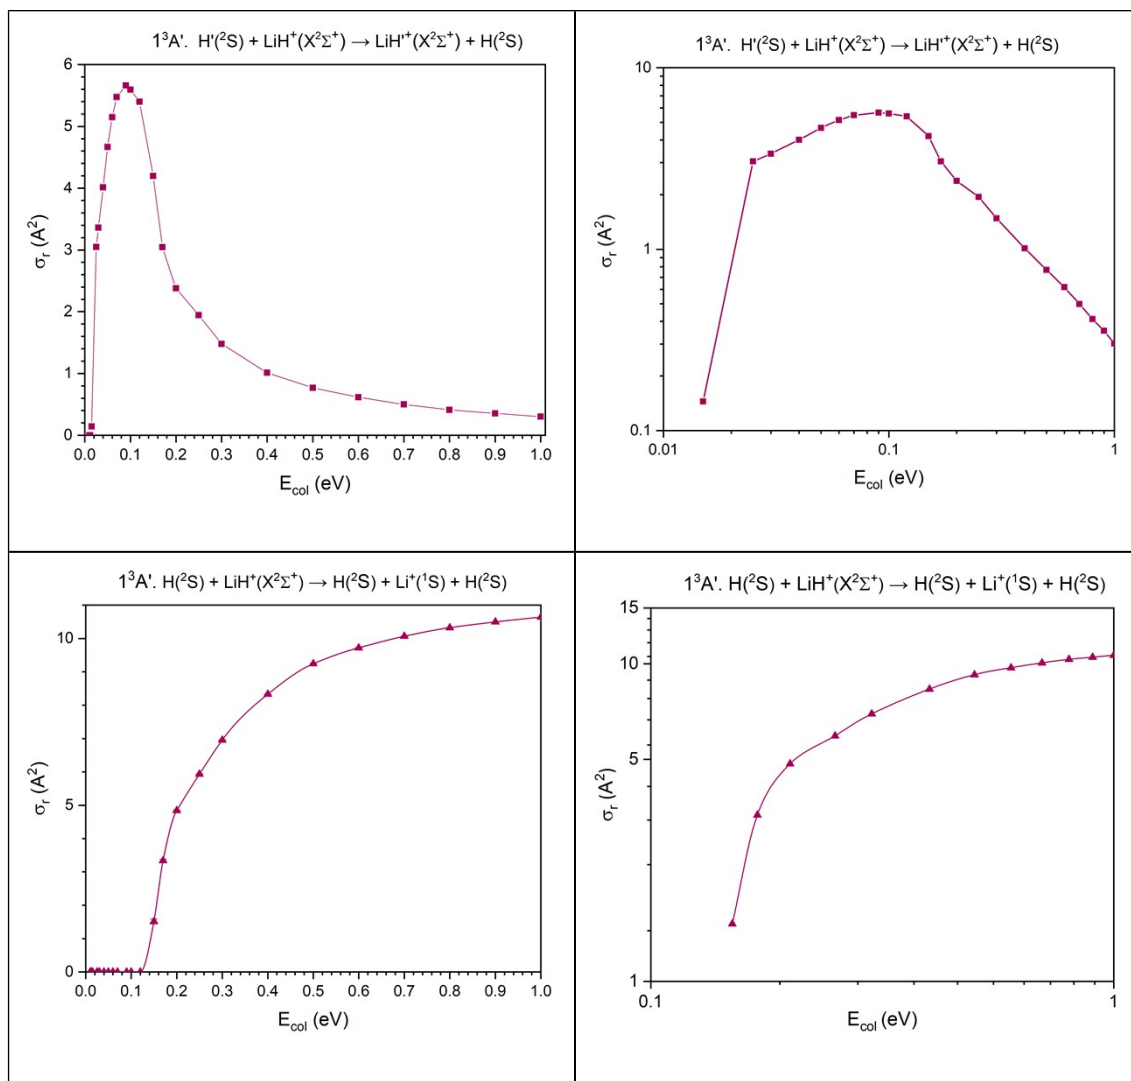

**Figure S10.** Cross sections for the reactions on the excited  $1^3A'$  PES: exchange (top) and collision induced dissociation (bottom). The double logarithmic representation is given on the right column.

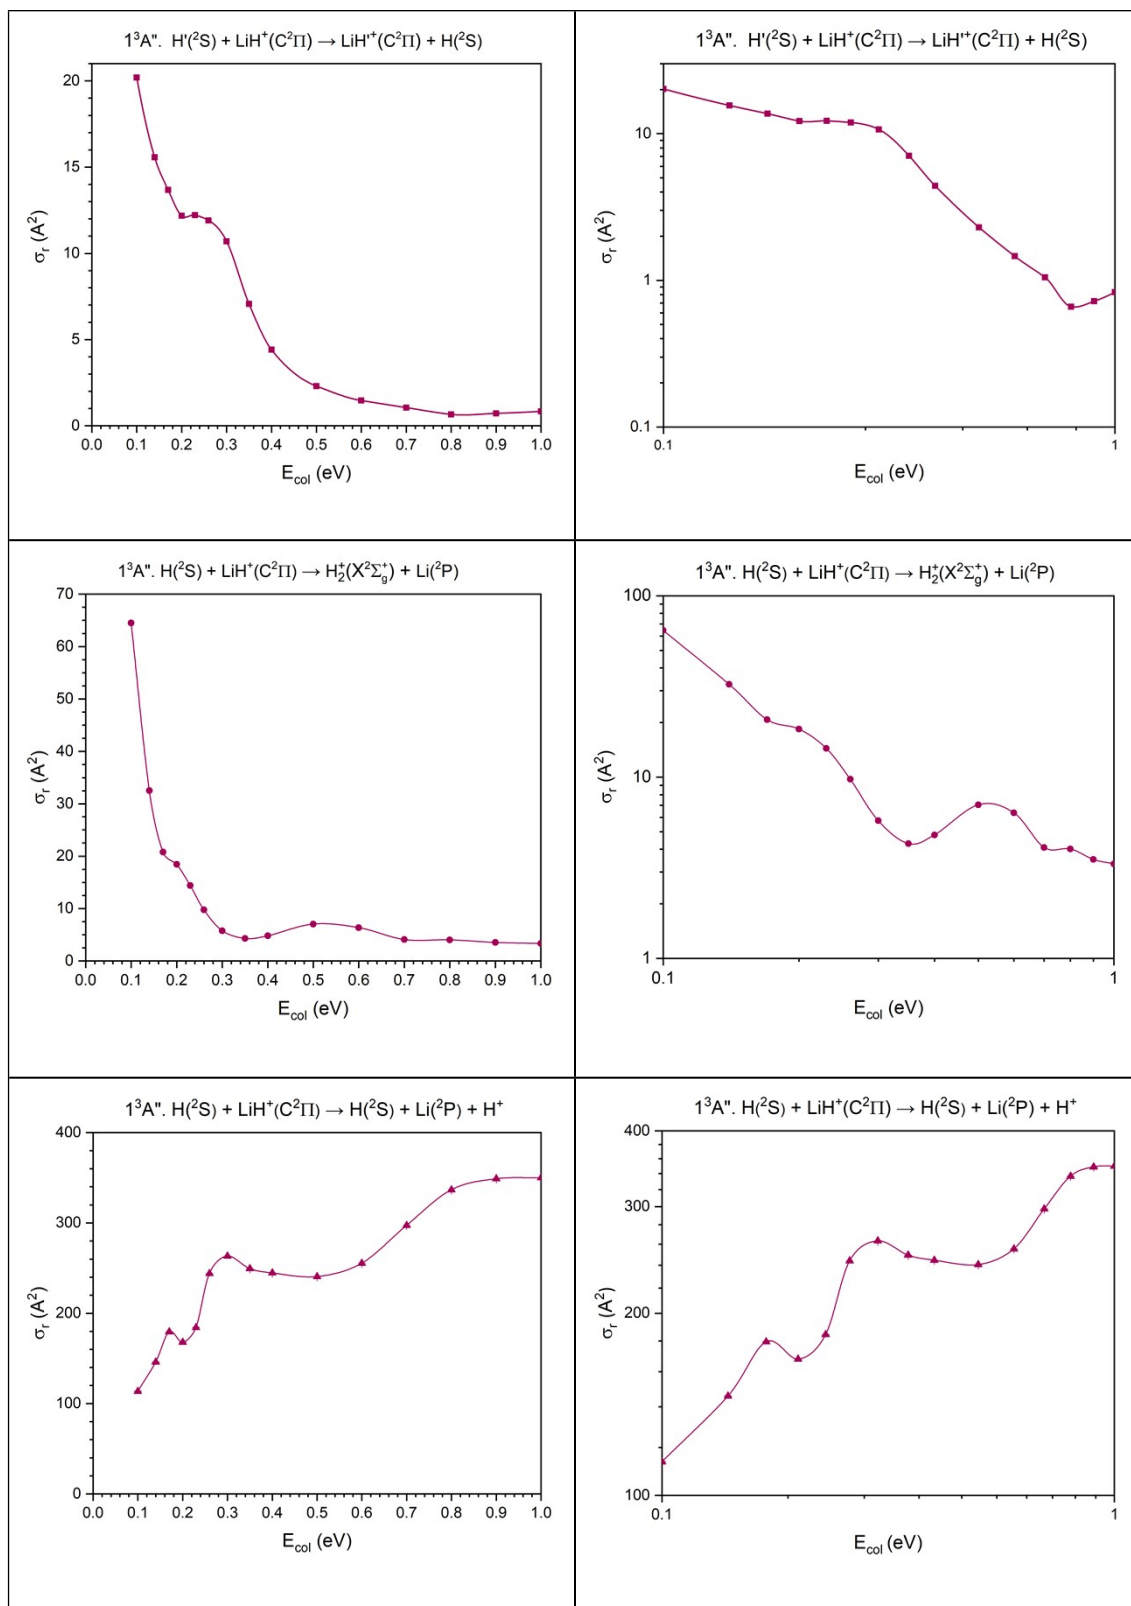

**Figure S11.** Cross sections for the reactions on the excited  $1^3A''$  PES: exchange (top),  $H^+$  transfer (middle) and collision induced dissociation (bottom). The double logarithmic representation is given on the right column.

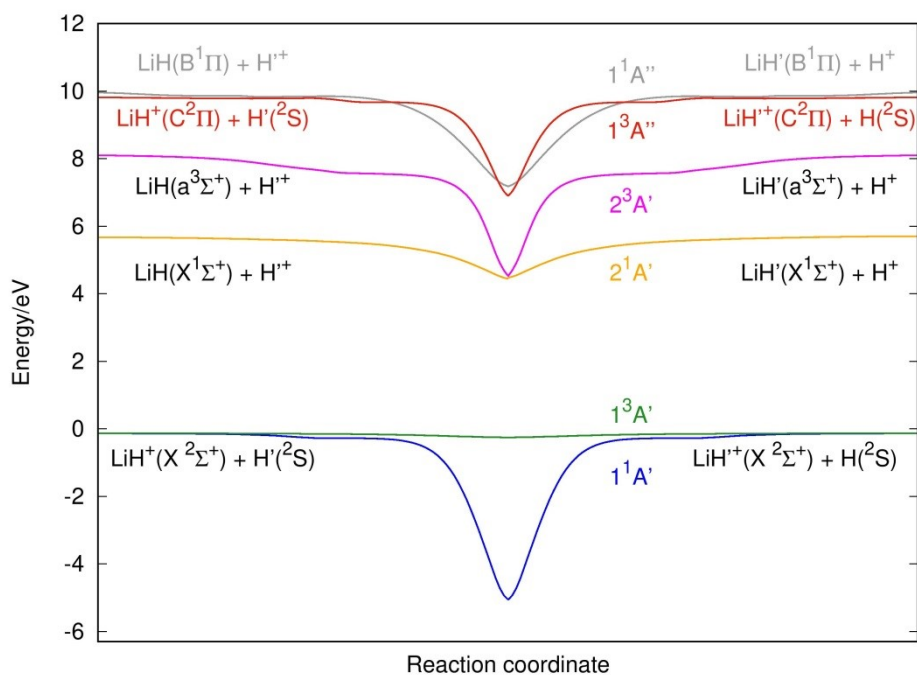

**Figure S12.** Schematic representation of the minimum energy paths for the exchange reaction channel. Energy is in eV with respect to the zero energy defined by the sum of the  $\text{Li}^+(^1\text{S})$  and twice  $\text{H}(^2\text{S})$  energies for all the six PESs considered. The reaction coordinate is given in arbitrary units.

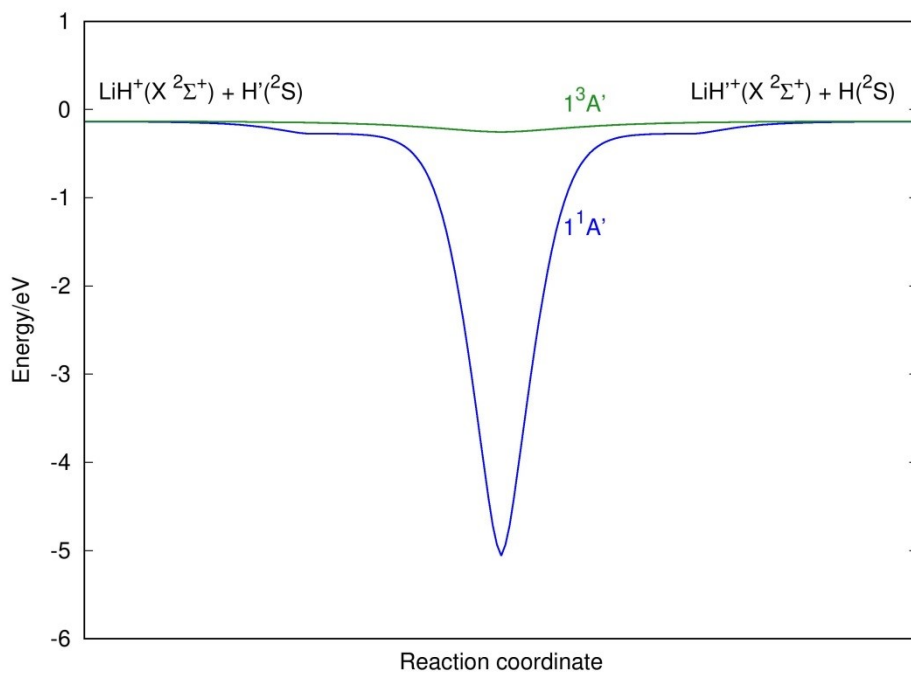

**Figure S13.** A more detailed view of the minimum energy paths for the exchange reaction channel of the  $1^1A'$  and  $1^3A'$  PESs. Energy is in eV with respect to zero energy defined by the sum of the  $\text{Li}^+(^1\text{S})$  and twice  $\text{H}(^2\text{S})$  energies. The reaction coordinate is given in arbitrary units.

## References

- <sup>1</sup> R. Martinazzo, G. F. Tantardini, E. Bodo and F. A. Gianturco, *J. Chem. Phys.* 2003, **119**, 11241.
- <sup>2</sup> W. P. Kraemer and V. Špirko, *Chem. Phys.* 2006, **330**, 190.
- <sup>3</sup> X. He, S. Lv, T. Hayat and K. Han, *J. Phys. Chem. A* 2016, **120**, 2459.
- <sup>4</sup> D. J. Searles and E. I. von Nagy-Felsobuki, *Phys. Rev. A* 1991, **43**, 3365.
- <sup>5</sup> I. Pino, R. Martinazzo and G. F. Tantardini, *Phys. Chem. Chem. Phys.* 2008, **10**, 5545.
- <sup>6</sup> T. Roy and S. Mahapatra, *Chem. Phys.* 2015, **448**, 34
- <sup>7</sup> M. Dong, W. Li, D. He and M. Chen, *RSC Adv.* 2017, **7**, 7008.
- <sup>8</sup> Y.-M. Li and Y. Lei, *J. Theor. Comput. Chem.* 2020, **19**, 2050002.
- <sup>9</sup> J. Sahoo, A. M. S. Rawat and S. Mahapatra, *J. Phys. Chem. A* 2021, **125**, 3387.
- <sup>10</sup> N. Bulut, J. F. Castillo, F. J. Aoiz and L. Bañares, *Phys. Chem. Chem. Phys.* 2008, **10**, 821.
- <sup>11</sup> E. Aslan, N. Bulut, J. F. Castillo, L. Bañares, F. J. Aoiz and O. Roncero, *Astrophys. J.* 2012, **759**, 31.

## Fortran code 1. Analytical expression of the ground 1<sup>1</sup>A' PES.

```
subroutine fit3d(r12,r13,r23,e,der)
  implicit real*8 (a-h,o-z)
  dimension der(3)
  call diat12(r12,e12,d12)
  call diat12(r13,e13,d13)
  call diat23(r23,e23,d23)
  call triabb(r12,r13,r23,e123,der)
  e=e12+e13+e23+e123
  der(1)=d12+der(1)
  der(2)=d13+der(2)
  der(3)=d23+der(3)
  return
end
*****
*****
      subroutine diat12(r,ener,der)
*****
*****
*      This subroutine computes the energies of a diatomic
potential
*      fitted to      54 points
*      rms =          0.00962617 kcal/mol
*      emax =         0.02792475 kcal/mol
*****
*****
      implicit real*8 (a-h,o-z)
      dimension cf( 7)
      data cf( 1)/0.1440890733503789D+01/
      data cf( 2)/-.5412322695150536D-01/
      data cf( 3)/-.4163802944217001D+00/
      data cf( 4)/0.8576852475109086D-01/
      data cf( 5)/0.3309760270606295D+00/
      data cf( 6)/-.7977077554345092D+00/
      data cf( 7)/0.2451531836339704D+00/
      e0=0.0000000000000000D+00
      der=0.d0
      vex1=0.6991300994658561D+00
      vex2=0.6119847074786407D+00
      aux = 1.d0/r
      bux = dexp(-vex2*r)*aux
      cux = dexp(-vex1*r)
      ener=e0+cf(1)*bux
      dux=1.d0
      eux=r*cux
      do 1 i=2, 7
        der=der+(i-1)*cf(i)*dux
        dux=dux*eux
        ener=ener+cf(i)*dux
1 continue
      der=der*(1.d0-vex1*r)*cux
      der=der-cf(1)*(vex2+aux)*bux
      return
```

```

end
*****
*****
      subroutine diat23(r,ener,der)
*****
*****
*       This subroutine computes the energies of a diatomic
potential
*       fitted to      59 points
*       rms =          0.03804557 kcal/mol
*       emax =          0.09823988 kcal/mol
*****
*****
      implicit real*8 (a-h,o-z)
      dimension cf( 9)
      data cf( 1)/0.7363322426706777D+00/
      data cf( 2)/-.3720297141830095D+01/
      data cf( 3)/0.2561632528249042D+02/
      data cf( 4)/-.1889752559185310D+03/
      data cf( 5)/0.3963507253283522D+03/
      data cf( 6)/0.5652927233516857D+04/
      data cf( 7)/-.5310607688527115D+05/
      data cf( 8)/0.1842872473224173D+06/
      data cf( 9)/-.2390105816282381D+06/
      e0=0.0000000000000000D+00
      der=0.d0
      vex1=0.1612539122145108D+01
      vex2=0.8525862854625745D+00
      aux = 1.d0/r
      bux = dexp(-vex2*r)*aux
      cux = dexp(-vex1*r)
      ener=e0+cf(1)*bux
      dux=1.d0
      eux=r*cux
      do 1 i=2, 9
          der=der+(i-1)*cf(i)*dux
          dux=dux*eux
          ener=ener+cf(i)*dux
1 continue
      der=der*(1.d0-vex1*r)*cux
      der=der-cf(1)*(vex2+aux)*bux
      return
      end
*****
*****
      subroutine triabb(r12,r13,r23,ener,der)
*****
*****
*       This subroutine computes the energies of a 3D PES
*       for the ABB system class fitted to 44612 points
*       rms =          0.37268159 kcal/mol
*       emax =          3.51520088 kcal/mol
*****
*****
      implicit real*8(a-h,o-z)
      dimension i1( 55),i2( 55),i3( 55),i4( 55),cf(
55)
      dimension f12(0: 6),f13(0: 6),f23(0: 6)
      dimension der(3)

```

data cf( 1)/-.1014547220695584D+01/  
data il( 1)/ 1/,i2( 1)/ 1/,i3( 1)/ 0/,i4( 1)/ 2/  
data cf( 2)/-.2794317684912635D+01/  
data il( 2)/ 1/,i2( 2)/ 0/,i3( 2)/ 1/,i4( 2)/ 1/  
data cf( 3)/-.1053266019598949D+03/  
data il( 3)/ 1/,i2( 3)/ 1/,i3( 3)/ 1/,i4( 3)/ 1/  
data cf( 4)/0.2171803906723379D+02/  
data il( 4)/ 2/,i2( 4)/ 1/,i3( 4)/ 0/,i4( 4)/ 2/  
data cf( 5)/0.4657322470946350D+02/  
data il( 5)/ 2/,i2( 5)/ 0/,i3( 5)/ 1/,i4( 5)/ 2/  
data cf( 6)/0.2262336309104361D+02/  
data il( 6)/ 0/,i2( 6)/ 2/,i3( 6)/ 1/,i4( 6)/ 2/  
data cf( 7)/0.7464121744663421D+03/  
data il( 7)/ 2/,i2( 7)/ 1/,i3( 7)/ 1/,i4( 7)/ 2/  
data cf( 8)/-.1588418796740669D+03/  
data il( 8)/ 1/,i2( 8)/ 2/,i3( 8)/ 1/,i4( 8)/ 1/  
data cf( 9)/-.9171218688960189D+02/  
data il( 9)/ 2/,i2( 9)/ 2/,i3( 9)/ 0/,i4( 9)/ 2/  
data cf( 10)/-.5362573512252783D+03/  
data il( 10)/ 2/,i2( 10)/ 0/,i3( 10)/ 2/,i4( 10)/ 1/  
data cf( 11)/-.2179909292013345D+03/  
data il( 11)/ 3/,i2( 11)/ 1/,i3( 11)/ 0/,i4( 11)/ 2/  
data cf( 12)/-.2884080497409670D+03/  
data il( 12)/ 3/,i2( 12)/ 0/,i3( 12)/ 1/,i4( 12)/ 2/  
data cf( 13)/0.3974211254489363D+02/  
data il( 13)/ 0/,i2( 13)/ 3/,i3( 13)/ 1/,i4( 13)/ 2/  
data cf( 14)/-.1793690683794917D+04/  
data il( 14)/ 2/,i2( 14)/ 2/,i3( 14)/ 1/,i4( 14)/ 2/  
data cf( 15)/-.3864892369796088D+04/  
data il( 15)/ 2/,i2( 15)/ 1/,i3( 15)/ 2/,i4( 15)/ 1/  
data cf( 16)/-.1318993295477847D+04/  
data il( 16)/ 3/,i2( 16)/ 1/,i3( 16)/ 1/,i4( 16)/ 2/  
data cf( 17)/0.2857943078833065D+04/  
data il( 17)/ 1/,i2( 17)/ 3/,i3( 17)/ 1/,i4( 17)/ 1/  
data cf( 18)/0.2586627239815855D+03/  
data il( 18)/ 3/,i2( 18)/ 2/,i3( 18)/ 0/,i4( 18)/ 2/  
data cf( 19)/0.2358772235582289D+04/  
data il( 19)/ 3/,i2( 19)/ 0/,i3( 19)/ 2/,i4( 19)/ 2/  
data cf( 20)/0.7009631599549559D+03/  
data il( 20)/ 0/,i2( 20)/ 3/,i3( 20)/ 2/,i4( 20)/ 2/  
data cf( 21)/0.6290723089078425D+03/  
data il( 21)/ 4/,i2( 21)/ 1/,i3( 21)/ 0/,i4( 21)/ 2/  
data cf( 22)/0.8014934692105323D+03/  
data il( 22)/ 4/,i2( 22)/ 0/,i3( 22)/ 1/,i4( 22)/ 2/  
data cf( 23)/-.1618135786346971D+04/  
data il( 23)/ 0/,i2( 23)/ 4/,i3( 23)/ 1/,i4( 23)/ 2/  
data cf( 24)/0.6134395961989920D+04/  
data il( 24)/ 2/,i2( 24)/ 2/,i3( 24)/ 2/,i4( 24)/ 1/  
data cf( 25)/0.1936241598644449D+04/  
data il( 25)/ 3/,i2( 25)/ 2/,i3( 25)/ 1/,i4( 25)/ 2/  
data cf( 26)/0.6337895967561134D+04/  
data il( 26)/ 3/,i2( 26)/ 1/,i3( 26)/ 2/,i4( 26)/ 2/  
data cf( 27)/0.2018186679116811D+04/  
data il( 27)/ 1/,i2( 27)/ 3/,i3( 27)/ 2/,i4( 27)/ 2/  
data cf( 28)/0.2714246624469634D+04/  
data il( 28)/ 3/,i2( 28)/ 3/,i3( 28)/ 0/,i4( 28)/ 2/



data cf( 29)/-.6087465622502077D+04/  
data il( 29)/ 3/,i2( 29)/ 0/,i3( 29)/ 3/,i4( 29)/ 1/  
data cf( 30)/0.3722476143730888D+03/  
data il( 30)/ 4/,i2( 30)/ 1/,i3( 30)/ 1/,i4( 30)/ 2/  
data cf( 31)/-.8625308023933826D+04/  
data il( 31)/ 1/,i2( 31)/ 4/,i3( 31)/ 1/,i4( 31)/ 1/  
data cf( 32)/-.2413305858257138D+04/  
data il( 32)/ 4/,i2( 32)/ 2/,i3( 32)/ 0/,i4( 32)/ 2/  
data cf( 33)/-.4527548814071714D+04/  
data il( 33)/ 4/,i2( 33)/ 0/,i3( 33)/ 2/,i4( 33)/ 2/  
data cf( 34)/-.4361164524816215D+04/  
data il( 34)/ 0/,i2( 34)/ 4/,i3( 34)/ 2/,i4( 34)/ 2/  
data cf( 35)/-.2173173418381897D+02/  
data il( 35)/ 5/,i2( 35)/ 1/,i3( 35)/ 0/,i4( 35)/ 2/  
data cf( 36)/-.9124696176573320D+03/  
data il( 36)/ 5/,i2( 36)/ 0/,i3( 36)/ 1/,i4( 36)/ 2/  
data cf( 37)/0.7738466184538001D+04/  
data il( 37)/ 0/,i2( 37)/ 5/,i3( 37)/ 1/,i4( 37)/ 2/  
data cf( 38)/-.6715658741369955D+03/  
data il( 38)/ 3/,i2( 38)/ 2/,i3( 38)/ 2/,i4( 38)/ 2/  
data cf( 39)/-.2024021230760642D+05/  
data il( 39)/ 2/,i2( 39)/ 3/,i3( 39)/ 2/,i4( 39)/ 1/  
data cf( 40)/0.2284494631121076D+05/  
data il( 40)/ 3/,i2( 40)/ 3/,i3( 40)/ 1/,i4( 40)/ 2/  
data cf( 41)/-.2451588941089384D+05/  
data il( 41)/ 3/,i2( 41)/ 1/,i3( 41)/ 3/,i4( 41)/ 1/  
data cf( 42)/-.1796836787388634D+05/  
data il( 42)/ 4/,i2( 42)/ 2/,i3( 42)/ 1/,i4( 42)/ 2/  
data cf( 43)/0.1093420805120413D+05/  
data il( 43)/ 4/,i2( 43)/ 1/,i3( 43)/ 2/,i4( 43)/ 2/  
data cf( 44)/-.7867188429861572D+04/  
data il( 44)/ 1/,i2( 44)/ 4/,i3( 44)/ 2/,i4( 44)/ 2/  
data cf( 45)/-.2093164311965843D+04/  
data il( 45)/ 4/,i2( 45)/ 3/,i3( 45)/ 0/,i4( 45)/ 2/  
data cf( 46)/0.5348596796357068D+04/  
data il( 46)/ 4/,i2( 46)/ 0/,i3( 46)/ 3/,i4( 46)/ 2/  
data cf( 47)/-.6318793851052782D+04/  
data il( 47)/ 0/,i2( 47)/ 4/,i3( 47)/ 3/,i4( 47)/ 2/  
data cf( 48)/0.2434449562014364D+03/  
data il( 48)/ 5/,i2( 48)/ 1/,i3( 48)/ 1/,i4( 48)/ 2/  
data cf( 49)/0.1107542831535004D+05/  
data il( 49)/ 1/,i2( 49)/ 5/,i3( 49)/ 1/,i4( 49)/ 1/  
data cf( 50)/0.5859854181305584D+04/  
data il( 50)/ 5/,i2( 50)/ 2/,i3( 50)/ 0/,i4( 50)/ 2/  
data cf( 51)/0.2649597606540259D+04/  
data il( 51)/ 5/,i2( 51)/ 0/,i3( 51)/ 2/,i4( 51)/ 2/  
data cf( 52)/0.8608878093156504D+04/  
data il( 52)/ 0/,i2( 52)/ 5/,i3( 52)/ 2/,i4( 52)/ 2/  
data cf( 53)/-.1658147436455788D+04/  
data il( 53)/ 6/,i2( 53)/ 1/,i3( 53)/ 0/,i4( 53)/ 2/  
data cf( 54)/0.2962363762398714D+03/  
data il( 54)/ 6/,i2( 54)/ 0/,i3( 54)/ 1/,i4( 54)/ 2/  
data cf( 55)/-.1150180303193682D+05/  
data il( 55)/ 0/,i2( 55)/ 6/,i3( 55)/ 1/,i4( 55)/ 2/  
vex1=0.1027980066618575D+01  
vex2=0.1372494569355204D+01

```

f12(0)=1.d0
f13(0)=1.d0
f23(0)=1.d0
bux12=r12*dexp(-vex1*r12)
bux13=r13*dexp(-vex1*r13)
bux23=r23*dexp(-vex2*r23)
do 1 i=1, 6
    f12(i)=f12(i-1)*bux12
    f13(i)=f13(i-1)*bux13
    f23(i)=f23(i-1)*bux23
1 continue
ener = 0.d0
der12 = 0.d0
der13 = 0.d0
der23 = 0.d0
do 2 l=1, 55
    if (i4(l).eq.1) then
        aux=f12(i1(l))*f13(i3(l))*f23(i2(l))
        dux12=i1(l)*f12(i1(l)-1)*f13(i3(l))*f23(i2(l))
        dux13=i3(l)*f12(i1(l))*f13(i3(l)-1)*f23(i2(l))
        dux23=i2(l)*f12(i1(l))*f13(i3(l))*f23(i2(l)-1)
    else
        aux1=f12(i1(l))*f13(i3(l))
        aux2=f12(i3(l))*f13(i1(l))
        aux=(aux1+aux2)*f23(i2(l))
        dux23=(aux1+aux2)*i2(l)*f23(i2(l)-1)
        dux1=i1(l)*f12(i1(l)-1)*f13(i3(l))
        dux2=i3(l)*f12(i3(l)-1)*f13(i1(l))
        dux12=(dux1+dux2)*f23(i2(l))
        dux1=i3(l)*f12(i1(l))*f13(i3(l)-1)
        dux2=i1(l)*f12(i3(l))*f13(i1(l)-1)
        dux13=(dux1+dux2)*f23(i2(l))
    endif
    ener=ener+cf(l)*aux
    der12=der12+cf(l)*dux12
    der13=der13+cf(l)*dux13
    der23=der23+cf(l)*dux23
2 continue
der(1)=der12*(1.d0-vex1*r12)*dexp(-vex1*r12)
der(2)=der13*(1.d0-vex1*r13)*dexp(-vex1*r13)
der(3)=der23*(1.d0-vex2*r23)*dexp(-vex2*r23)
return
end

```

## Fortran code 2. Analytical expression of the excited 2<sup>1</sup>A' PES.

```
subroutine fit3d(r12,r13,r23,e,der)
  implicit real*8 (a-h,o-z)
  dimension der(3)
  call diat12(r12,e12,d12)
  call diat12(r13,e13,d13)
  call diat23(r23,e23,d23)
  call triabb(r12,r13,r23,e123,der)
  e=e12+e13+e23+e123
  der(1)=d12+der(1)
  der(2)=d13+der(2)
  der(3)=d23+der(3)
  return
end
*****
*****
      subroutine diat12(r,ener,der)
*****
*****
*      This subroutine computes the energies of a diatomic
potential
*      fitted to      53 points
*      rms =      0.72758578 kcal/mol
*      emax =      1.39552895 kcal/mol
*****
*****
      implicit real*8 (a-h,o-z)
      dimension cf( 13)
      data cf( 1)/0.2523064558752669D+01/
      data cf( 2)/-.6402706666014535D+01/
      data cf( 3)/0.3587056876797626D+03/
      data cf( 4)/-.1434349390256489D+05/
      data cf( 5)/0.3599481614963323D+06/
      data cf( 6)/-.5782698778156763D+07/
      data cf( 7)/0.6148002385585026D+08/
      data cf( 8)/-.4414318497698402D+09/
      data cf( 9)/0.2149750038999408D+10/
      data cf(10)/-.6994564632141600D+10/
      data cf(11)/0.1455226646768256D+11/
      data cf(12)/-.1750087151748045D+11/
      data cf(13)/0.9252426397575498D+10/
      e0=0.0000000000000000D+00
      der=0.d0
      vex1=0.1168260087394666D+01
      vex2=0.1748386264688349D+01
      aux = 1.d0/r
      bux = dexp(-vex2*r)*aux
      cux = dexp(-vex1*r)
      ener=e0+cf(1)*bux
      dux=1.d0
      eux=r*cux
      do 1 i=2, 13
```

```

        der=der+(i-1)*cf(i)*dux
        dux=dux*eux
        ener=ener+cf(i)*dux
1 continue
    der=der*(1.d0-vex1*r)*cux
    der=der-cf(1)*(vex2+aux)*bux
    return
end
*****
*****
        subroutine diat23(r,ener,der)
*****
*****
*       This subroutine computes the energies of a diatomic
potential
*       fitted to      69 points
*       rms =      0.00678127 kcal/mol
*       emax =      0.01986148 kcal/mol
*****
*****
        implicit real*8 (a-h,o-z)
        dimension cf( 11)
        data cf( 1)/0.10230729950111111D+01/
        data cf( 2)/-.2416709176408609D+00/
        data cf( 3)/-.3900969316074534D+01/
        data cf( 4)/0.6709516064703307D+02/
        data cf( 5)/-.6913716386068441D+03/
        data cf( 6)/0.4585460355375840D+04/
        data cf( 7)/-.1983923520023503D+05/
        data cf( 8)/0.5554812388226776D+05/
        data cf( 9)/-.9691888604977434D+05/
        data cf(10)/0.9572866154008034D+05/
        data cf(11)/-.4086601888467368D+05/
        e0=0.0000000000000000D+00
        der=0.d0
        vex1=0.8492838719300601D+00
        vex2=0.1706755264515816D+01
        aux = 1.d0/r
        bux = dexp(-vex2*r)*aux
        cux = dexp(-vex1*r)
        ener=e0+cf(1)*bux
        dux=1.d0
        eux=r*cux
        do 1 i=2, 11
            der=der+(i-1)*cf(i)*dux
            dux=dux*eux
            ener=ener+cf(i)*dux
1 continue
    der=der*(1.d0-vex1*r)*cux
    der=der-cf(1)*(vex2+aux)*bux
    return
end
*****
*****
        subroutine triabb(r12,r13,r23,ener,der)
*****
*****
*       This subroutine computes the energies of a 3D PES

```

```

*      for the ABB system class fitted to 49153 points
*      rms =      0.78978166 kcal/mol
*      emax =     11.25565406 kcal/mol
*****
implicit real*8(a-h,o-z)
dimension i1( 106),i2( 106),i3( 106),i4( 106),cf(
106)
dimension f12(0: 8),f13(0: 8),f23(0: 8)
dimension der(3)
data cf( 1)/0.5722918820543362D+01/
data i1( 1)/ 1/,i2( 1)/ 1/,i3( 1)/ 0/,i4( 1)/ 2/
data cf( 2)/-.5017983707936421D+02/
data i1( 2)/ 1/,i2( 2)/ 0/,i3( 2)/ 1/,i4( 2)/ 1/
data cf( 3)/0.2091355443252302D+03/
data i1( 3)/ 1/,i2( 3)/ 1/,i3( 3)/ 1/,i4( 3)/ 1/
data cf( 4)/-.2456003873515218D+02/
data i1( 4)/ 2/,i2( 4)/ 1/,i3( 4)/ 0/,i4( 4)/ 2/
data cf( 5)/0.1173692936103162D+03/
data i1( 5)/ 2/,i2( 5)/ 0/,i3( 5)/ 1/,i4( 5)/ 2/
data cf( 6)/-.2747991963821448D+02/
data i1( 6)/ 0/,i2( 6)/ 2/,i3( 6)/ 1/,i4( 6)/ 2/
data cf( 7)/-.5046719947608118D+03/
data i1( 7)/ 2/,i2( 7)/ 1/,i3( 7)/ 1/,i4( 7)/ 2/
data cf( 8)/-.3232564522392671D+03/
data i1( 8)/ 1/,i2( 8)/ 2/,i3( 8)/ 1/,i4( 8)/ 1/
data cf( 9)/0.8420240314681237D+02/
data i1( 9)/ 2/,i2( 9)/ 2/,i3( 9)/ 0/,i4( 9)/ 2/
data cf( 10)/-.1456568046999063D+03/
data i1( 10)/ 2/,i2( 10)/ 0/,i3( 10)/ 2/,i4( 10)/ 1/
data cf( 11)/0.8111830392050980D+02/
data i1( 11)/ 3/,i2( 11)/ 1/,i3( 11)/ 0/,i4( 11)/ 2/
data cf( 12)/0.1814387458339129D+02/
data i1( 12)/ 3/,i2( 12)/ 0/,i3( 12)/ 1/,i4( 12)/ 2/
data cf( 13)/0.5151532224914611D+02/
data i1( 13)/ 0/,i2( 13)/ 3/,i3( 13)/ 1/,i4( 13)/ 2/
data cf( 14)/0.5636038984701948D+03/
data i1( 14)/ 2/,i2( 14)/ 2/,i3( 14)/ 1/,i4( 14)/ 2/
data cf( 15)/0.1133929076992068D+04/
data i1( 15)/ 2/,i2( 15)/ 1/,i3( 15)/ 2/,i4( 15)/ 1/
data cf( 16)/0.5012583153185484D+03/
data i1( 16)/ 3/,i2( 16)/ 1/,i3( 16)/ 1/,i4( 16)/ 2/
data cf( 17)/0.2880469687959027D+03/
data i1( 17)/ 1/,i2( 17)/ 3/,i3( 17)/ 1/,i4( 17)/ 1/
data cf( 18)/-.1145283430311228D+03/
data i1( 18)/ 3/,i2( 18)/ 2/,i3( 18)/ 0/,i4( 18)/ 2/
data cf( 19)/-.4113039112545837D+03/
data i1( 19)/ 3/,i2( 19)/ 0/,i3( 19)/ 2/,i4( 19)/ 2/
data cf( 20)/-.1329220998911589D+03/
data i1( 20)/ 0/,i2( 20)/ 3/,i3( 20)/ 2/,i4( 20)/ 2/
data cf( 21)/-.2204329015530753D+03/
data i1( 21)/ 4/,i2( 21)/ 1/,i3( 21)/ 0/,i4( 21)/ 2/
data cf( 22)/-.4864662003404308D+03/
data i1( 22)/ 4/,i2( 22)/ 0/,i3( 22)/ 1/,i4( 22)/ 2/
data cf( 23)/-.4986782955975617D+02/
data i1( 23)/ 0/,i2( 23)/ 4/,i3( 23)/ 1/,i4( 23)/ 2/
data cf( 24)/-.8272430897170308D+03/

```

data i1( 24)/ 2/,i2( 24)/ 2/,i3( 24)/ 2/,i4( 24)/ 1/  
data cf( 25)/-.6796345823158415D+03/  
data i1( 25)/ 3/,i2( 25)/ 2/,i3( 25)/ 1/,i4( 25)/ 2/  
data cf( 26)/-.1035454885634819D+04/  
data i1( 26)/ 3/,i2( 26)/ 1/,i3( 26)/ 2/,i4( 26)/ 2/  
data cf( 27)/-.3016998659685465D+03/  
data i1( 27)/ 1/,i2( 27)/ 3/,i3( 27)/ 2/,i4( 27)/ 2/  
data cf( 28)/0.1098369733408290D+03/  
data i1( 28)/ 3/,i2( 28)/ 3/,i3( 28)/ 0/,i4( 28)/ 2/  
data cf( 29)/0.4098740303614485D+04/  
data i1( 29)/ 3/,i2( 29)/ 0/,i3( 29)/ 3/,i4( 29)/ 1/  
data cf( 30)/0.3396934472768041D+03/  
data i1( 30)/ 4/,i2( 30)/ 1/,i3( 30)/ 1/,i4( 30)/ 2/  
data cf( 31)/-.1645372199557781D+03/  
data i1( 31)/ 1/,i2( 31)/ 4/,i3( 31)/ 1/,i4( 31)/ 1/  
data cf( 32)/0.1549509667559394D+03/  
data i1( 32)/ 4/,i2( 32)/ 2/,i3( 32)/ 0/,i4( 32)/ 2/  
data cf( 33)/-.7226408049205251D+03/  
data i1( 33)/ 4/,i2( 33)/ 0/,i3( 33)/ 2/,i4( 33)/ 2/  
data cf( 34)/0.1108206488564541D+03/  
data i1( 34)/ 0/,i2( 34)/ 4/,i3( 34)/ 2/,i4( 34)/ 2/  
data cf( 35)/0.3112742652717123D+03/  
data i1( 35)/ 5/,i2( 35)/ 1/,i3( 35)/ 0/,i4( 35)/ 2/  
data cf( 36)/0.1289900741008550D+04/  
data i1( 36)/ 5/,i2( 36)/ 0/,i3( 36)/ 1/,i4( 36)/ 2/  
data cf( 37)/0.2659969707297347D+02/  
data i1( 37)/ 0/,i2( 37)/ 5/,i3( 37)/ 1/,i4( 37)/ 2/  
data cf( 38)/0.8116981400954038D+03/  
data i1( 38)/ 3/,i2( 38)/ 2/,i3( 38)/ 2/,i4( 38)/ 2/  
data cf( 39)/0.1182516249420435D+03/  
data i1( 39)/ 2/,i2( 39)/ 3/,i3( 39)/ 2/,i4( 39)/ 1/  
data cf( 40)/0.3478765640446728D+03/  
data i1( 40)/ 3/,i2( 40)/ 3/,i3( 40)/ 1/,i4( 40)/ 2/  
data cf( 41)/-.1778638593260127D+04/  
data i1( 41)/ 3/,i2( 41)/ 1/,i3( 41)/ 3/,i4( 41)/ 1/  
data cf( 42)/0.1866360615522683D+03/  
data i1( 42)/ 4/,i2( 42)/ 2/,i3( 42)/ 1/,i4( 42)/ 2/  
data cf( 43)/0.1758405344135222D+04/  
data i1( 43)/ 4/,i2( 43)/ 1/,i3( 43)/ 2/,i4( 43)/ 2/  
data cf( 44)/0.9699594346118272D+02/  
data i1( 44)/ 1/,i2( 44)/ 4/,i3( 44)/ 2/,i4( 44)/ 2/  
data cf( 45)/-.3390284281888744D+02/  
data i1( 45)/ 4/,i2( 45)/ 3/,i3( 45)/ 0/,i4( 45)/ 2/  
data cf( 46)/-.3431010583909843D+04/  
data i1( 46)/ 4/,i2( 46)/ 0/,i3( 46)/ 3/,i4( 46)/ 2/  
data cf( 47)/-.6946364932241389D+02/  
data i1( 47)/ 0/,i2( 47)/ 4/,i3( 47)/ 3/,i4( 47)/ 2/  
data cf( 48)/-.1505611667814908D+04/  
data i1( 48)/ 5/,i2( 48)/ 1/,i3( 48)/ 1/,i4( 48)/ 2/  
data cf( 49)/0.5826227659727804D+02/  
data i1( 49)/ 1/,i2( 49)/ 5/,i3( 49)/ 1/,i4( 49)/ 1/  
data cf( 50)/-.2170025736048315D+03/  
data i1( 50)/ 5/,i2( 50)/ 2/,i3( 50)/ 0/,i4( 50)/ 2/  
data cf( 51)/0.1775470915359418D+04/  
data i1( 51)/ 5/,i2( 51)/ 0/,i3( 51)/ 2/,i4( 51)/ 2/  
data cf( 52)/-.5033640032877160D+02/

data i1( 52)/ 0/,i2( 52)/ 5/,i3( 52)/ 2/,i4( 52)/ 2/  
data cf( 53)/-.1265260545206771D+03/  
data i1( 53)/ 6/,i2( 53)/ 1/,i3( 53)/ 0/,i4( 53)/ 2/  
data cf( 54)/-.1550916995938528D+04/  
data i1( 54)/ 6/,i2( 54)/ 0/,i3( 54)/ 1/,i4( 54)/ 2/  
data cf( 55)/-.7508980784707570D+01/  
data i1( 55)/ 0/,i2( 55)/ 6/,i3( 55)/ 1/,i4( 55)/ 2/  
data cf( 56)/-.2045835052483064D+03/  
data i1( 56)/ 3/,i2( 56)/ 3/,i3( 56)/ 2/,i4( 56)/ 2/  
data cf( 57)/0.4742222069308286D+03/  
data i1( 57)/ 3/,i2( 57)/ 2/,i3( 57)/ 3/,i4( 57)/ 1/  
data cf( 58)/-.7195645248486708D+03/  
data i1( 58)/ 4/,i2( 58)/ 2/,i3( 58)/ 2/,i4( 58)/ 2/  
data cf( 59)/0.5439673991269598D+02/  
data i1( 59)/ 2/,i2( 59)/ 4/,i3( 59)/ 2/,i4( 59)/ 1/  
data cf( 60)/-.1074683563897579D+03/  
data i1( 60)/ 4/,i2( 60)/ 3/,i3( 60)/ 1/,i4( 60)/ 2/  
data cf( 61)/0.5879884160147818D+03/  
data i1( 61)/ 4/,i2( 61)/ 1/,i3( 61)/ 3/,i4( 61)/ 2/  
data cf( 62)/-.8636293702511852D+02/  
data i1( 62)/ 1/,i2( 62)/ 4/,i3( 62)/ 3/,i4( 62)/ 2/  
data cf( 63)/0.1409899845617880D+02/  
data i1( 63)/ 4/,i2( 63)/ 4/,i3( 63)/ 0/,i4( 63)/ 2/  
data cf( 64)/0.2323404164990046D+04/  
data i1( 64)/ 4/,i2( 64)/ 0/,i3( 64)/ 4/,i4( 64)/ 1/  
data cf( 65)/0.2153556996033233D+03/  
data i1( 65)/ 5/,i2( 65)/ 2/,i3( 65)/ 1/,i4( 65)/ 2/  
data cf( 66)/-.1001169410632592D+04/  
data i1( 66)/ 5/,i2( 66)/ 1/,i3( 66)/ 2/,i4( 66)/ 2/  
data cf( 67)/-.2051437660506561D+02/  
data i1( 67)/ 1/,i2( 67)/ 5/,i3( 67)/ 2/,i4( 67)/ 2/  
data cf( 68)/0.6109290077421992D+01/  
data i1( 68)/ 5/,i2( 68)/ 3/,i3( 68)/ 0/,i4( 68)/ 2/  
data cf( 69)/0.1504433697360542D+04/  
data i1( 69)/ 5/,i2( 69)/ 0/,i3( 69)/ 3/,i4( 69)/ 2/  
data cf( 70)/0.2104744467630383D+02/  
data i1( 70)/ 0/,i2( 70)/ 5/,i3( 70)/ 3/,i4( 70)/ 2/  
data cf( 71)/0.1423317775012512D+04/  
data i1( 71)/ 6/,i2( 71)/ 1/,i3( 71)/ 1/,i4( 71)/ 2/  
data cf( 72)/-.1128423842046185D+02/  
data i1( 72)/ 1/,i2( 72)/ 6/,i3( 72)/ 1/,i4( 72)/ 1/  
data cf( 73)/0.1694866673209051D+03/  
data i1( 73)/ 6/,i2( 73)/ 2/,i3( 73)/ 0/,i4( 73)/ 2/  
data cf( 74)/-.1705604967883224D+04/  
data i1( 74)/ 6/,i2( 74)/ 0/,i3( 74)/ 2/,i4( 74)/ 2/  
data cf( 75)/0.1192250267955902D+02/  
data i1( 75)/ 0/,i2( 75)/ 6/,i3( 75)/ 2/,i4( 75)/ 2/  
data cf( 76)/-.1106344925735777D+03/  
data i1( 76)/ 7/,i2( 76)/ 1/,i3( 76)/ 0/,i4( 76)/ 2/  
data cf( 77)/0.9539922178007842D+03/  
data i1( 77)/ 7/,i2( 77)/ 0/,i3( 77)/ 1/,i4( 77)/ 2/  
data cf( 78)/0.9156443170884776D+00/  
data i1( 78)/ 0/,i2( 78)/ 7/,i3( 78)/ 1/,i4( 78)/ 2/  
data cf( 79)/0.2202761048325887D+03/  
data i1( 79)/ 3/,i2( 79)/ 3/,i3( 79)/ 3/,i4( 79)/ 1/  
data cf( 80)/0.2166388132272332D+01/

```

data i1( 80)/ 4/,i2( 80)/ 3/,i3( 80)/ 2/,i4( 80)/ 2/
data cf( 81)/-.5218389250369101D+03/
data i1( 81)/ 4/,i2( 81)/ 2/,i3( 81)/ 3/,i4( 81)/ 2/
data cf( 82)/-.1008775347661615D+02/
data i1( 82)/ 2/,i2( 82)/ 4/,i3( 82)/ 3/,i4( 82)/ 2/
data cf( 83)/0.4479320280894132D+02/
data i1( 83)/ 4/,i2( 83)/ 4/,i3( 83)/ 1/,i4( 83)/ 2/
data cf( 84)/0.1177645997270097D+04/
data i1( 84)/ 4/,i2( 84)/ 1/,i3( 84)/ 4/,i4( 84)/ 1/
data cf( 85)/0.6685823938612132D+03/
data i1( 85)/ 5/,i2( 85)/ 2/,i3( 85)/ 2/,i4( 85)/ 2/
data cf( 86)/-.6572547883797575D+01/
data i1( 86)/ 2/,i2( 86)/ 5/,i3( 86)/ 2/,i4( 86)/ 1/
data cf( 87)/-.7079540500968668D+02/
data i1( 87)/ 5/,i2( 87)/ 3/,i3( 87)/ 1/,i4( 87)/ 2/
data cf( 88)/-.2516809643969990D+03/
data i1( 88)/ 5/,i2( 88)/ 1/,i3( 88)/ 3/,i4( 88)/ 2/
data cf( 89)/0.5271049526638937D+01/
data i1( 89)/ 1/,i2( 89)/ 5/,i3( 89)/ 3/,i4( 89)/ 2/
data cf( 90)/0.9520258088105281D+01/
data i1( 90)/ 5/,i2( 90)/ 4/,i3( 90)/ 0/,i4( 90)/ 2/
data cf( 91)/-.1121684082143045D+04/
data i1( 91)/ 5/,i2( 91)/ 0/,i3( 91)/ 4/,i4( 91)/ 2/
data cf( 92)/-.5425794825174498D+01/
data i1( 92)/ 0/,i2( 92)/ 5/,i3( 92)/ 4/,i4( 92)/ 2/
data cf( 93)/-.1287743158140319D+03/
data i1( 93)/ 6/,i2( 93)/ 2/,i3( 93)/ 1/,i4( 93)/ 2/
data cf( 94)/-.4383079802832761D+03/
data i1( 94)/ 6/,i2( 94)/ 1/,i3( 94)/ 2/,i4( 94)/ 2/
data cf( 95)/0.2117848136778486D+01/
data i1( 95)/ 1/,i2( 95)/ 6/,i3( 95)/ 2/,i4( 95)/ 2/
data cf( 96)/-.1835339764486768D+02/
data i1( 96)/ 6/,i2( 96)/ 3/,i3( 96)/ 0/,i4( 96)/ 2/
data cf( 97)/0.1601318568826274D+03/
data i1( 97)/ 6/,i2( 97)/ 0/,i3( 97)/ 3/,i4( 97)/ 2/
data cf( 98)/-.1965448963161335D+01/
data i1( 98)/ 0/,i2( 98)/ 6/,i3( 98)/ 3/,i4( 98)/ 2/
data cf( 99)/-.2955286609087560D+03/
data i1( 99)/ 7/,i2( 99)/ 1/,i3( 99)/ 1/,i4( 99)/ 2/
data cf(100)/0.9064482961225421D+00/
data i1(100)/ 1/,i2(100)/ 7/,i3(100)/ 1/,i4(100)/ 1/
data cf(101)/-.3723896205232873D+02/
data i1(101)/ 7/,i2(101)/ 2/,i3(101)/ 0/,i4(101)/ 2/
data cf(102)/0.9069253493005318D+03/
data i1(102)/ 7/,i2(102)/ 0/,i3(102)/ 2/,i4(102)/ 2/
data cf(103)/-.1187233028861015D+01/
data i1(103)/ 0/,i2(103)/ 7/,i3(103)/ 2/,i4(103)/ 2/
data cf(104)/0.8226337275619237D+02/
data i1(104)/ 8/,i2(104)/ 1/,i3(104)/ 0/,i4(104)/ 2/
data cf(105)/-.3977161750734615D+03/
data i1(105)/ 8/,i2(105)/ 0/,i3(105)/ 1/,i4(105)/ 2/
data cf(106)/-.1435949801245581D-01/
data i1(106)/ 0/,i2(106)/ 8/,i3(106)/ 1/,i4(106)/ 2/
vex1=0.4996307990298401D+00
vex2=0.1699080711134188D+00
f12(0)=1.d0

```



```

f13(0)=1.d0
f23(0)=1.d0
bux12=r12*dexp(-vex1*r12)
bux13=r13*dexp(-vex1*r13)
bux23=r23*dexp(-vex2*r23)
do 1 i=1, 8
    f12(i)=f12(i-1)*bux12
    f13(i)=f13(i-1)*bux13
    f23(i)=f23(i-1)*bux23
1 continue
ener = 0.d0
der12 = 0.d0
der13 = 0.d0
der23 = 0.d0
do 2 l=1,106
    if (i4(l).eq.1) then
        aux=f12(i1(l))*f13(i3(l))*f23(i2(l))
        dux12=i1(l)*f12(i1(l)-1)*f13(i3(l))*f23(i2(l))
        dux13=i3(l)*f12(i1(l))*f13(i3(l)-1)*f23(i2(l))
        dux23=i2(l)*f12(i1(l))*f13(i3(l))*f23(i2(l)-1)
    else
        aux1=f12(i1(l))*f13(i3(l))
        aux2=f12(i3(l))*f13(i1(l))
        aux=(aux1+aux2)*f23(i2(l))
        dux23=(aux1+aux2)*i2(l)*f23(i2(l)-1)
        dux1=i1(l)*f12(i1(l)-1)*f13(i3(l))
        dux2=i3(l)*f12(i3(l)-1)*f13(i1(l))
        dux12=(dux1+dux2)*f23(i2(l))
        dux1=i3(l)*f12(i1(l))*f13(i3(l)-1)
        dux2=i1(l)*f12(i3(l))*f13(i1(l)-1)
        dux13=(dux1+dux2)*f23(i2(l))
    endif
    ener=ener+cf(l)*aux
    der12=der12+cf(l)*dux12
    der13=der13+cf(l)*dux13
    der23=der23+cf(l)*dux23
2 continue
der(1)=der12*(1.d0-vex1*r12)*dexp(-vex1*r12)
der(2)=der13*(1.d0-vex1*r13)*dexp(-vex1*r13)
der(3)=der23*(1.d0-vex2*r23)*dexp(-vex2*r23)
return
end

```

### Fortran code 3. Analytical expression of the excited $1^1A''$ PES.

```
subroutine fit3d(r12,r13,r23,e,der)
  implicit real*8 (a-h,o-z)
  dimension der(3)
  call diat12(r12,e12,d12)
  call diat12(r13,e13,d13)
  call diat23(r23,e23,d23)
  call triabb(r12,r13,r23,e123,der)
  e=e12+e13+e23+e123
  der(1)=d12+der(1)
  der(2)=d13+der(2)
  der(3)=d23+der(3)
  return
end

*****
*****
      subroutine diat12(r,ener,der)
*****
*****
*      This subroutine computes the energies of a diatomic
potential
*      fitted to      61 points
*      rms =          0.00415884 kcal/mol
*      emax =          0.01342953 kcal/mol
*****
*****
      implicit real*8 (a-h,o-z)
      dimension cf( 11)
      data cf( 1)/0.1728681581542760D+01/
      data cf( 2)/-.8696895244194306D-01/
      data cf( 3)/-.1249140242092167D+01/
      data cf( 4)/0.7256887562139883D+01/
      data cf( 5)/-.3649313303125749D+01/
      data cf( 6)/-.2092960246381420D+03/
      data cf( 7)/0.1583838349649344D+04/
      data cf( 8)/-.6027970170568976D+04/
      data cf( 9)/0.1358740005165506D+05/
      data cf(10)/-.1743446552915056D+05/
      data cf(11)/0.1004855927106030D+05/
      e0=0.0000000000000000D+00
      der=0.d0
      vex1=0.9973983062075690D+00
      vex2=0.9430558414200502D+00
      aux = 1.d0/r
      bux = dexp(-vex2*r)*aux
      cux = dexp(-vex1*r)
      ener=e0+cf(1)*bux
      dux=1.d0
      eux=r*cux
      do 1 i=2, 11
        der=der+(i-1)*cf(i)*dux
        dux=dux*eux
```

```

ener=ener+cf(i)*dux
1 continue
der=der*(1.d0-vex1*r)*cux
der=der-cf(1)*(vex2+aux)*bux
return
end
*****
*****
subroutine diat23(r,ener,der)
*****
*****
* This subroutine computes the energies of a diatomic
potential
* fitted to 65 points
* rms = 0.01590125 kcal/mol
* emax = 0.05660348 kcal/mol
*****
*****
implicit real*8 (a-h,o-z)
dimension cf( 11)
data cf( 1)/0.1010010815772820D+01/
data cf( 2)/-.7887699956696838D+00/
data cf( 3)/0.4906159588439826D+01/
data cf( 4)/-.6219863154243669D+02/
data cf( 5)/0.6896895670668164D+03/
data cf( 6)/-.5363366498220737D+04/
data cf( 7)/0.2773950145917346D+05/
data cf( 8)/-.9300358123786467D+05/
data cf( 9)/0.1936313158084306D+06/
data cf( 10)/-.2270595952691409D+06/
data cf( 11)/0.1144414374786166D+06/
e0=0.0000000000000000D+00
der=0.d0
vex1=0.9833832398267376D+00
vex2=0.1631998058149494D+01
aux = 1.d0/r
bux = dexp(-vex2*r)*aux
cux = dexp(-vex1*r)
ener=e0+cf(1)*bux
dux=1.d0
eux=r*cux
do 1 i=2, 11
der=der+(i-1)*cf(i)*dux
dux=dux*eux
ener=ener+cf(i)*dux
1 continue
der=der*(1.d0-vex1*r)*cux
der=der-cf(1)*(vex2+aux)*bux
return
end
*****
*****
subroutine triabb(r12,r13,r23,ener,der)
*****
*****
* This subroutine computes the energies of a 3D PES
* for the ABB system class fitted to 30497 points
* rms = 0.26116725 kcal/mol

```

```

*      emax =      2.14840892 kcal/mol
*****
implicit real*8(a-h,o-z)
dimension i1( 55),i2( 55),i3( 55),i4( 55),cf(
55)
dimension f12(0: 6),f13(0: 6),f23(0: 6)
dimension der(3)
data cf( 1)/0.2342649363134195D+00/
data i1( 1)/ 1/,i2( 1)/ 1/,i3( 1)/ 0/,i4( 1)/ 2/
data cf( 2)/-.1902316917762371D+00/
data i1( 2)/ 1/,i2( 2)/ 0/,i3( 2)/ 1/,i4( 2)/ 1/
data cf( 3)/0.1737364131123290D+01/
data i1( 3)/ 1/,i2( 3)/ 1/,i3( 3)/ 1/,i4( 3)/ 1/
data cf( 4)/-.2347585411761579D+01/
data i1( 4)/ 2/,i2( 4)/ 1/,i3( 4)/ 0/,i4( 4)/ 2/
data cf( 5)/0.4945380884828863D+00/
data i1( 5)/ 2/,i2( 5)/ 0/,i3( 5)/ 1/,i4( 5)/ 2/
data cf( 6)/-.8515994146754172D+00/
data i1( 6)/ 0/,i2( 6)/ 2/,i3( 6)/ 1/,i4( 6)/ 2/
data cf( 7)/0.3516059047583602D+01/
data i1( 7)/ 2/,i2( 7)/ 1/,i3( 7)/ 1/,i4( 7)/ 2/
data cf( 8)/-.1563268091733962D+02/
data i1( 8)/ 1/,i2( 8)/ 2/,i3( 8)/ 1/,i4( 8)/ 1/
data cf( 9)/0.1147342821857560D+02/
data i1( 9)/ 2/,i2( 9)/ 2/,i3( 9)/ 0/,i4( 9)/ 2/
data cf( 10)/-.6691375831332327D+01/
data i1( 10)/ 2/,i2( 10)/ 0/,i3( 10)/ 2/,i4( 10)/ 1/
data cf( 11)/0.3078228427848201D+01/
data i1( 11)/ 3/,i2( 11)/ 1/,i3( 11)/ 0/,i4( 11)/ 2/
data cf( 12)/0.1609668726285160D+01/
data i1( 12)/ 3/,i2( 12)/ 0/,i3( 12)/ 1/,i4( 12)/ 2/
data cf( 13)/0.4521149915913508D-01/
data i1( 13)/ 0/,i2( 13)/ 3/,i3( 13)/ 1/,i4( 13)/ 2/
data cf( 14)/0.6700886576956400D+01/
data i1( 14)/ 2/,i2( 14)/ 2/,i3( 14)/ 1/,i4( 14)/ 2/
data cf( 15)/0.1744910942940251D+02/
data i1( 15)/ 2/,i2( 15)/ 1/,i3( 15)/ 2/,i4( 15)/ 1/
data cf( 16)/-.2600169763196097D+02/
data i1( 16)/ 3/,i2( 16)/ 1/,i3( 16)/ 1/,i4( 16)/ 2/
data cf( 17)/0.2011225561278666D+02/
data i1( 17)/ 1/,i2( 17)/ 3/,i3( 17)/ 1/,i4( 17)/ 1/
data cf( 18)/-.1487637995020903D+02/
data i1( 18)/ 3/,i2( 18)/ 2/,i3( 18)/ 0/,i4( 18)/ 2/
data cf( 19)/0.7931589273652284D+01/
data i1( 19)/ 3/,i2( 19)/ 0/,i3( 19)/ 2/,i4( 19)/ 2/
data cf( 20)/-.1793292392595960D+02/
data i1( 20)/ 0/,i2( 20)/ 3/,i3( 20)/ 2/,i4( 20)/ 2/
data cf( 21)/0.3627782093842377D+01/
data i1( 21)/ 4/,i2( 21)/ 1/,i3( 21)/ 0/,i4( 21)/ 2/
data cf( 22)/-.3772197779122629D+01/
data i1( 22)/ 4/,i2( 22)/ 0/,i3( 22)/ 1/,i4( 22)/ 2/
data cf( 23)/0.8409798711966688D+01/
data i1( 23)/ 0/,i2( 23)/ 4/,i3( 23)/ 1/,i4( 23)/ 2/
data cf( 24)/-.9874613984960819D+02/
data i1( 24)/ 2/,i2( 24)/ 2/,i3( 24)/ 2/,i4( 24)/ 1/
data cf( 25)/0.7782573178329542D+02/

```

data i1( 25)/ 3/,i2( 25)/ 2/,i3( 25)/ 1/,i4( 25)/ 2/  
data cf( 26)/-.4345781718353521D+00/  
data i1( 26)/ 3/,i2( 26)/ 1/,i3( 26)/ 2/,i4( 26)/ 2/  
data cf( 27)/-.1224877388313884D+02/  
data i1( 27)/ 1/,i2( 27)/ 3/,i3( 27)/ 2/,i4( 27)/ 2/  
data cf( 28)/0.1573181858784662D+02/  
data i1( 28)/ 3/,i2( 28)/ 3/,i3( 28)/ 0/,i4( 28)/ 2/  
data cf( 29)/-.2087867559670412D+02/  
data i1( 29)/ 3/,i2( 29)/ 0/,i3( 29)/ 3/,i4( 29)/ 1/  
data cf( 30)/0.1241826787951822D+02/  
data i1( 30)/ 4/,i2( 30)/ 1/,i3( 30)/ 1/,i4( 30)/ 2/  
data cf( 31)/0.2344246194649803D+01/  
data i1( 31)/ 1/,i2( 31)/ 4/,i3( 31)/ 1/,i4( 31)/ 1/  
data cf( 32)/-.1543865068570187D+02/  
data i1( 32)/ 4/,i2( 32)/ 2/,i3( 32)/ 0/,i4( 32)/ 2/  
data cf( 33)/0.6230011836151902D+01/  
data i1( 33)/ 4/,i2( 33)/ 0/,i3( 33)/ 2/,i4( 33)/ 2/  
data cf( 34)/0.9809965888773928D+01/  
data i1( 34)/ 0/,i2( 34)/ 4/,i3( 34)/ 2/,i4( 34)/ 2/  
data cf( 35)/0.1870290663385688D+00/  
data i1( 35)/ 5/,i2( 35)/ 1/,i3( 35)/ 0/,i4( 35)/ 2/  
data cf( 36)/-.6597258925557439D+00/  
data i1( 36)/ 5/,i2( 36)/ 0/,i3( 36)/ 1/,i4( 36)/ 2/  
data cf( 37)/-.1997049481377055D+02/  
data i1( 37)/ 0/,i2( 37)/ 5/,i3( 37)/ 1/,i4( 37)/ 2/  
data cf( 38)/-.7064058594209141D+01/  
data i1( 38)/ 3/,i2( 38)/ 2/,i3( 38)/ 2/,i4( 38)/ 2/  
data cf( 39)/0.1815625069759855D+03/  
data i1( 39)/ 2/,i2( 39)/ 3/,i3( 39)/ 2/,i4( 39)/ 1/  
data cf( 40)/-.6653337713170020D+02/  
data i1( 40)/ 3/,i2( 40)/ 3/,i3( 40)/ 1/,i4( 40)/ 2/  
data cf( 41)/0.2421960146054511D+02/  
data i1( 41)/ 3/,i2( 41)/ 1/,i3( 41)/ 3/,i4( 41)/ 1/  
data cf( 42)/-.2578854725097071D+02/  
data i1( 42)/ 4/,i2( 42)/ 2/,i3( 42)/ 1/,i4( 42)/ 2/  
data cf( 43)/-.1745109812961078D+02/  
data i1( 43)/ 4/,i2( 43)/ 1/,i3( 43)/ 2/,i4( 43)/ 2/  
data cf( 44)/-.5027308084126993D+02/  
data i1( 44)/ 1/,i2( 44)/ 4/,i3( 44)/ 2/,i4( 44)/ 2/  
data cf( 45)/-.1922084974272137D+02/  
data i1( 45)/ 4/,i2( 45)/ 3/,i3( 45)/ 0/,i4( 45)/ 2/  
data cf( 46)/0.7489127176309867D+01/  
data i1( 46)/ 4/,i2( 46)/ 0/,i3( 46)/ 3/,i4( 46)/ 2/  
data cf( 47)/0.4365038664708807D+02/  
data i1( 47)/ 0/,i2( 47)/ 4/,i3( 47)/ 3/,i4( 47)/ 2/  
data cf( 48)/0.8779147203698517D+01/  
data i1( 48)/ 5/,i2( 48)/ 1/,i3( 48)/ 1/,i4( 48)/ 2/  
data cf( 49)/0.3236104687500785D+02/  
data i1( 49)/ 1/,i2( 49)/ 5/,i3( 49)/ 1/,i4( 49)/ 1/  
data cf( 50)/0.2140927901278137D+02/  
data i1( 50)/ 5/,i2( 50)/ 2/,i3( 50)/ 0/,i4( 50)/ 2/  
data cf( 51)/-.8361001559736217D+01/  
data i1( 51)/ 5/,i2( 51)/ 0/,i3( 51)/ 2/,i4( 51)/ 2/  
data cf( 52)/-.2025277884541815D+02/  
data i1( 52)/ 0/,i2( 52)/ 5/,i3( 52)/ 2/,i4( 52)/ 2/  
data cf( 53)/-.6048922520343221D+01/

```

data i1( 53)/ 6/,i2( 53)/ 1/,i3( 53)/ 0/,i4( 53)/ 2/
data cf( 54)/0.2996716937672140D+01/
data i1( 54)/ 6/,i2( 54)/ 0/,i3( 54)/ 1/,i4( 54)/ 2/
data cf( 55)/0.1356567023776261D+02/
data i1( 55)/ 0/,i2( 55)/ 6/,i3( 55)/ 1/,i4( 55)/ 2/
vex1=0.4559920117533886D+00
vex2=0.7144847301068902D+00
f12(0)=1.d0
f13(0)=1.d0
f23(0)=1.d0
bux12=r12*dexp(-vex1*r12)
bux13=r13*dexp(-vex1*r13)
bux23=r23*dexp(-vex2*r23)
do 1 i=1, 6
    f12(i)=f12(i-1)*bux12
    f13(i)=f13(i-1)*bux13
    f23(i)=f23(i-1)*bux23
1 continue
ener = 0.d0
der12 = 0.d0
der13 = 0.d0
der23 = 0.d0
do 2 l=1, 55
    if (i4(l).eq.1) then
        aux=f12(i1(l))*f13(i3(l))*f23(i2(l))
        dux12=i1(l)*f12(i1(l)-1)*f13(i3(l))*f23(i2(l))
        dux13=i3(l)*f12(i1(l))*f13(i3(l)-1)*f23(i2(l))
        dux23=i2(l)*f12(i1(l))*f13(i3(l))*f23(i2(l)-1)
    else
        aux1=f12(i1(l))*f13(i3(l))
        aux2=f12(i3(l))*f13(i1(l))
        aux=(aux1+aux2)*f23(i2(l))
        dux23=(aux1+aux2)*i2(l)*f23(i2(l)-1)
        dux1=i1(l)*f12(i1(l)-1)*f13(i3(l))
        dux2=i3(l)*f12(i3(l)-1)*f13(i1(l))
        dux12=(dux1+dux2)*f23(i2(l))
        dux1=i3(l)*f12(i1(l))*f13(i3(l)-1)
        dux2=i1(l)*f12(i3(l))*f13(i1(l)-1)
        dux13=(dux1+dux2)*f23(i2(l))
    endif
    ener=ener+cf(l)*aux
    der12=der12+cf(l)*dux12
    der13=der13+cf(l)*dux13
    der23=der23+cf(l)*dux23
2 continue
der(1)=der12*(1.d0-vex1*r12)*dexp(-vex1*r12)
der(2)=der13*(1.d0-vex1*r13)*dexp(-vex1*r13)
der(3)=der23*(1.d0-vex2*r23)*dexp(-vex2*r23)
return
end

```

#### Fortran code 4. Analytical expression of the excited $1^3A'$ PES.

```
subroutine fit3d(r12,r13,r23,e,der)
  implicit real*8 (a-h,o-z)
  dimension der(3)
  call diat12(r12,e12,d12)
  call diat12(r13,e13,d13)
  call diat23(r23,e23,d23)
  call triabb(r12,r13,r23,e123,der)
  e=e12+e13+e23+e123
  der(1)=d12+der(1)
  der(2)=d13+der(2)
  der(3)=d23+der(3)
  return
end

*****
*****
      subroutine diat12(r,ener,der)
*****
*****
*      This subroutine computes the energies of a diatomic
potential
*      fitted to      57 points
*      rms =      0.00602335 kcal/mol
*      emax =      0.01563994 kcal/mol
*****
*****
      implicit real*8 (a-h,o-z)
      dimension cf( 9)
      data cf( 1)/0.1538173115866930D+01/
      data cf( 2)/-.1672665770259515D-01/
      data cf( 3)/-.6216496440374958D-01/
      data cf( 4)/-.1265761585408977D+01/
      data cf( 5)/0.6390811027765745D+01/
      data cf( 6)/-.2030701278242597D+02/
      data cf( 7)/0.3775784829665356D+02/
      data cf( 8)/-.3766808177685533D+02/
      data cf( 9)/0.1525302873820288D+02/
      e0=0.0000000000000000D+00
      der=0.d0
      vex1=0.6318438807074429D+00
      vex2=0.7405123792895593D+00
      aux = 1.d0/r
      bux = dexp(-vex2*r)*aux
      cux = dexp(-vex1*r)
      ener=e0+cf(1)*bux
      dux=1.d0
      eux=r*cux
      do 1 i=2, 9
        der=der+(i-1)*cf(i)*dux
        dux=dux*eux
        ener=ener+cf(i)*dux
1 continue
```

```

    der=der*(1.d0-vex1*r)*cux
    der=der-cf(1)*(vex2+aux)*bux
    return
end
*****
*****
    subroutine diat23(r,ener,der)
*****
*****
*       This subroutine computes the energies of a diatomic
potential
*       fitted to      67 points
*       rms =         0.01731213 kcal/mol
*       emax =        0.04233003 kcal/mol
*****
*****
    implicit real*8 (a-h,o-z)
    dimension cf( 11)
    data cf( 1)/0.1337847086959146D+01/
    data cf( 2)/0.2585800665293710D+01/
    data cf( 3)/-.4004748068631668D+02/
    data cf( 4)/0.1343733522297093D+04/
    data cf( 5)/-.3170516869807047D+05/
    data cf( 6)/0.4885923727131493D+06/
    data cf( 7)/-.4918701586711237D+07/
    data cf( 8)/0.3203933330855191D+08/
    data cf( 9)/-.1299193151010496D+09/
    data cf(10)/0.2978127229925779D+09/
    data cf(11)/-.2944933154669650D+09/
    e0=0.0000000000000000D+00
    der=0.d0
    vex1=0.1832053626039320D+01
    vex2=0.2386896311658729D+01
    aux = 1.d0/r
    bux = dexp(-vex2*r)*aux
    cux = dexp(-vex1*r)
    ener=e0+cf(1)*bux
    dux=1.d0
    eux=r*cux
    do 1 i=2, 11
        der=der+(i-1)*cf(i)*dux
        dux=dux*eux
        ener=ener+cf(i)*dux
1 continue
    der=der*(1.d0-vex1*r)*cux
    der=der-cf(1)*(vex2+aux)*bux
    return
end
*****
*****
    subroutine triabb(r12,r13,r23,ener,der)
*****
*****
*       This subroutine computes the energies of a 3D PES
*       for the ABB system class fitted to 40230 points
*       rms =         0.37363045 kcal/mol
*       emax =        2.43593629 kcal/mol
*****
*****

```



```

implicit real*8(a-h,o-z)
dimension i1( 78),i2( 78),i3( 78),i4( 78),cf(
78)
dimension f12(0: 7),f13(0: 7),f23(0: 7)
dimension der(3)
data cf( 1)/0.1593465762284637D+01/
data i1( 1)/ 1/,i2( 1)/ 1/,i3( 1)/ 0/,i4( 1)/ 2/
data cf( 2)/0.1380539088104646D+00/
data i1( 2)/ 1/,i2( 2)/ 0/,i3( 2)/ 1/,i4( 2)/ 1/
data cf( 3)/0.1086175813726766D+03/
data i1( 3)/ 1/,i2( 3)/ 1/,i3( 3)/ 1/,i4( 3)/ 1/
data cf( 4)/-.6005161505064049D+02/
data i1( 4)/ 2/,i2( 4)/ 1/,i3( 4)/ 0/,i4( 4)/ 2/
data cf( 5)/-.8367227421423601D+00/
data i1( 5)/ 2/,i2( 5)/ 0/,i3( 5)/ 1/,i4( 5)/ 2/
data cf( 6)/-.9538199066014516D+02/
data i1( 6)/ 0/,i2( 6)/ 2/,i3( 6)/ 1/,i4( 6)/ 2/
data cf( 7)/-.2579468742331817D+03/
data i1( 7)/ 2/,i2( 7)/ 1/,i3( 7)/ 1/,i4( 7)/ 2/
data cf( 8)/-.1990641075141963D+04/
data i1( 8)/ 1/,i2( 8)/ 2/,i3( 8)/ 1/,i4( 8)/ 1/
data cf( 9)/0.1075008272369665D+04/
data i1( 9)/ 2/,i2( 9)/ 2/,i3( 9)/ 0/,i4( 9)/ 2/
data cf( 10)/0.3920458090925745D+01/
data i1( 10)/ 2/,i2( 10)/ 0/,i3( 10)/ 2/,i4( 10)/ 1/
data cf( 11)/0.2882068031286211D+03/
data i1( 11)/ 3/,i2( 11)/ 1/,i3( 11)/ 0/,i4( 11)/ 2/
data cf( 12)/0.2086371098015231D+01/
data i1( 12)/ 3/,i2( 12)/ 0/,i3( 12)/ 1/,i4( 12)/ 2/
data cf( 13)/0.2692508022386851D+04/
data i1( 13)/ 0/,i2( 13)/ 3/,i3( 13)/ 1/,i4( 13)/ 2/
data cf( 14)/-.1336310592400417D+04/
data i1( 14)/ 2/,i2( 14)/ 2/,i3( 14)/ 1/,i4( 14)/ 2/
data cf( 15)/0.3910374962064418D+04/
data i1( 15)/ 2/,i2( 15)/ 1/,i3( 15)/ 2/,i4( 15)/ 1/
data cf( 16)/-.1562118277230409D+04/
data i1( 16)/ 3/,i2( 16)/ 1/,i3( 16)/ 1/,i4( 16)/ 2/
data cf( 17)/0.7360605877000864D+05/
data i1( 17)/ 1/,i2( 17)/ 3/,i3( 17)/ 1/,i4( 17)/ 1/
data cf( 18)/0.1436787019377376D+04/
data i1( 18)/ 3/,i2( 18)/ 2/,i3( 18)/ 0/,i4( 18)/ 2/
data cf( 19)/-.7733131105498105D+01/
data i1( 19)/ 3/,i2( 19)/ 0/,i3( 19)/ 2/,i4( 19)/ 2/
data cf( 20)/-.4055086002660169D+05/
data i1( 20)/ 0/,i2( 20)/ 3/,i3( 20)/ 2/,i4( 20)/ 2/
data cf( 21)/-.4759353945880831D+03/
data i1( 21)/ 4/,i2( 21)/ 1/,i3( 21)/ 0/,i4( 21)/ 2/
data cf( 22)/-.2047989311576056D+01/
data i1( 22)/ 4/,i2( 22)/ 0/,i3( 22)/ 1/,i4( 22)/ 2/
data cf( 23)/-.3093224073182304D+05/
data i1( 23)/ 0/,i2( 23)/ 4/,i3( 23)/ 1/,i4( 23)/ 2/
data cf( 24)/-.1431290973063213D+05/
data i1( 24)/ 2/,i2( 24)/ 2/,i3( 24)/ 2/,i4( 24)/ 1/
data cf( 25)/0.1530265864709914D+05/
data i1( 25)/ 3/,i2( 25)/ 2/,i3( 25)/ 1/,i4( 25)/ 2/
data cf( 26)/-.3606215848767661D+04/

```

data i1( 26)/ 3/,i2( 26)/ 1/,i3( 26)/ 2/,i4( 26)/ 2/  
data cf( 27)/-.2613763389737555D+05/  
data i1( 27)/ 1/,i2( 27)/ 3/,i3( 27)/ 2/,i4( 27)/ 2/  
data cf( 28)/0.2425502714013408D+05/  
data i1( 28)/ 3/,i2( 28)/ 3/,i3( 28)/ 0/,i4( 28)/ 2/  
data cf( 29)/0.1200534790584008D+02/  
data i1( 29)/ 3/,i2( 29)/ 0/,i3( 29)/ 3/,i4( 29)/ 1/  
data cf( 30)/0.3137151901926974D+04/  
data i1( 30)/ 4/,i2( 30)/ 1/,i3( 30)/ 1/,i4( 30)/ 2/  
data cf( 31)/-.5873759326100443D+06/  
data i1( 31)/ 1/,i2( 31)/ 4/,i3( 31)/ 1/,i4( 31)/ 1/  
data cf( 32)/-.7761538092995199D+04/  
data i1( 32)/ 4/,i2( 32)/ 2/,i3( 32)/ 0/,i4( 32)/ 2/  
data cf( 33)/0.6262046515077513D+01/  
data i1( 33)/ 4/,i2( 33)/ 0/,i3( 33)/ 2/,i4( 33)/ 2/  
data cf( 34)/0.3414222239321112D+06/  
data i1( 34)/ 0/,i2( 34)/ 4/,i3( 34)/ 2/,i4( 34)/ 2/  
data cf( 35)/0.5444578246527525D+03/  
data i1( 35)/ 5/,i2( 35)/ 1/,i3( 35)/ 0/,i4( 35)/ 2/  
data cf( 36)/0.1246835650882357D+00/  
data i1( 36)/ 5/,i2( 36)/ 0/,i3( 36)/ 1/,i4( 36)/ 2/  
data cf( 37)/0.1528994259211896D+06/  
data i1( 37)/ 0/,i2( 37)/ 5/,i3( 37)/ 1/,i4( 37)/ 2/  
data cf( 38)/0.2210418489128586D+04/  
data i1( 38)/ 3/,i2( 38)/ 2/,i3( 38)/ 2/,i4( 38)/ 2/  
data cf( 39)/0.6347549389035141D+06/  
data i1( 39)/ 2/,i2( 39)/ 3/,i3( 39)/ 2/,i4( 39)/ 1/  
data cf( 40)/-.4254425906536806D+06/  
data i1( 40)/ 3/,i2( 40)/ 3/,i3( 40)/ 1/,i4( 40)/ 2/  
data cf( 41)/0.1049646422371278D+05/  
data i1( 41)/ 3/,i2( 41)/ 1/,i3( 41)/ 3/,i4( 41)/ 1/  
data cf( 42)/-.9050466544991188D+04/  
data i1( 42)/ 4/,i2( 42)/ 2/,i3( 42)/ 1/,i4( 42)/ 2/  
data cf( 43)/-.4065825329483570D+04/  
data i1( 43)/ 4/,i2( 43)/ 1/,i3( 43)/ 2/,i4( 43)/ 2/  
data cf( 44)/0.1996686499712976D+06/  
data i1( 44)/ 1/,i2( 44)/ 4/,i3( 44)/ 2/,i4( 44)/ 2/  
data cf( 45)/0.1154313339123439D+06/  
data i1( 45)/ 4/,i2( 45)/ 3/,i3( 45)/ 0/,i4( 45)/ 2/  
data cf( 46)/-.7939490372606879D+01/  
data i1( 46)/ 4/,i2( 46)/ 0/,i3( 46)/ 3/,i4( 46)/ 2/  
data cf( 47)/-.2230505065362797D+06/  
data i1( 47)/ 0/,i2( 47)/ 4/,i3( 47)/ 3/,i4( 47)/ 2/  
data cf( 48)/-.5323744879553769D+03/  
data i1( 48)/ 5/,i2( 48)/ 1/,i3( 48)/ 1/,i4( 48)/ 2/  
data cf( 49)/0.1581722032440149D+07/  
data i1( 49)/ 1/,i2( 49)/ 5/,i3( 49)/ 1/,i4( 49)/ 1/  
data cf( 50)/0.5471325567116290D+04/  
data i1( 50)/ 5/,i2( 50)/ 2/,i3( 50)/ 0/,i4( 50)/ 2/  
data cf( 51)/-.4816178245462967D+00/  
data i1( 51)/ 5/,i2( 51)/ 0/,i3( 51)/ 2/,i4( 51)/ 2/  
data cf( 52)/-.9690698851641440D+06/  
data i1( 52)/ 0/,i2( 52)/ 5/,i3( 52)/ 2/,i4( 52)/ 2/  
data cf( 53)/-.6205771199970242D+03/  
data i1( 53)/ 6/,i2( 53)/ 1/,i3( 53)/ 0/,i4( 53)/ 2/  
data cf( 54)/0.7282616294734210D+00/

```

data i1( 54)/ 6/,i2( 54)/ 0/,i3( 54)/ 1/,i4( 54)/ 2/
data cf( 55)/-.3286670281781343D+06/
data i1( 55)/ 0/,i2( 55)/ 6/,i3( 55)/ 1/,i4( 55)/ 2/
data cf( 56)/-.9203218721046858D+05/
data i1( 56)/ 3/,i2( 56)/ 3/,i3( 56)/ 2/,i4( 56)/ 2/
data cf( 57)/0.3870686742263555D+06/
data i1( 57)/ 3/,i2( 57)/ 2/,i3( 57)/ 3/,i4( 57)/ 1/
data cf( 58)/-.2882353344999062D+06/
data i1( 58)/ 4/,i2( 58)/ 2/,i3( 58)/ 2/,i4( 58)/ 2/
data cf( 59)/-.1785668505249989D+07/
data i1( 59)/ 2/,i2( 59)/ 4/,i3( 59)/ 2/,i4( 59)/ 1/
data cf( 60)/0.1413869011541432D+06/
data i1( 60)/ 4/,i2( 60)/ 3/,i3( 60)/ 1/,i4( 60)/ 2/
data cf( 61)/-.2055986605929290D+04/
data i1( 61)/ 4/,i2( 61)/ 1/,i3( 61)/ 3/,i4( 61)/ 2/
data cf( 62)/0.1175186161730540D+07/
data i1( 62)/ 1/,i2( 62)/ 4/,i3( 62)/ 3/,i4( 62)/ 2/
data cf( 63)/-.2674600624254684D+06/
data i1( 63)/ 4/,i2( 63)/ 4/,i3( 63)/ 0/,i4( 63)/ 2/
data cf( 64)/0.1273608702387414D+01/
data i1( 64)/ 4/,i2( 64)/ 0/,i3( 64)/ 4/,i4( 64)/ 1/
data cf( 65)/0.1148665650951955D+06/
data i1( 65)/ 5/,i2( 65)/ 2/,i3( 65)/ 1/,i4( 65)/ 2/
data cf( 66)/0.2040158035407468D+04/
data i1( 66)/ 5/,i2( 66)/ 1/,i3( 66)/ 2/,i4( 66)/ 2/
data cf( 67)/-.4200365505504206D+06/
data i1( 67)/ 1/,i2( 67)/ 5/,i3( 67)/ 2/,i4( 67)/ 2/
data cf( 68)/-.5505805614885832D+05/
data i1( 68)/ 5/,i2( 68)/ 3/,i3( 68)/ 0/,i4( 68)/ 2/
data cf( 69)/0.2760769720315645D+01/
data i1( 69)/ 5/,i2( 69)/ 0/,i3( 69)/ 3/,i4( 69)/ 2/
data cf( 70)/0.4197750118947557D+06/
data i1( 70)/ 0/,i2( 70)/ 5/,i3( 70)/ 3/,i4( 70)/ 2/
data cf( 71)/-.2860370085701244D+03/
data i1( 71)/ 6/,i2( 71)/ 1/,i3( 71)/ 1/,i4( 71)/ 2/
data cf( 72)/-.8241155591249131D+06/
data i1( 72)/ 1/,i2( 72)/ 6/,i3( 72)/ 1/,i4( 72)/ 1/
data cf( 73)/-.1913839389343370D+05/
data i1( 73)/ 6/,i2( 73)/ 2/,i3( 73)/ 0/,i4( 73)/ 2/
data cf( 74)/-.1502896313906952D+01/
data i1( 74)/ 6/,i2( 74)/ 0/,i3( 74)/ 2/,i4( 74)/ 2/
data cf( 75)/0.7280936741006975D+06/
data i1( 75)/ 0/,i2( 75)/ 6/,i3( 75)/ 2/,i4( 75)/ 2/
data cf( 76)/0.2464149454186640D+03/
data i1( 76)/ 7/,i2( 76)/ 1/,i3( 76)/ 0/,i4( 76)/ 2/
data cf( 77)/-.1291391050791530D+00/
data i1( 77)/ 7/,i2( 77)/ 0/,i3( 77)/ 1/,i4( 77)/ 2/
data cf( 78)/0.1656446817456111D+06/
data i1( 78)/ 0/,i2( 78)/ 7/,i3( 78)/ 1/,i4( 78)/ 2/
vex1=0.4437106205418788D+00
vex2=0.1826295667676822D+01
f12(0)=1.d0
f13(0)=1.d0
f23(0)=1.d0
bux12=r12*dexp(-vex1*r12)
bux13=r13*dexp(-vex1*r13)

```

```

bux23=r23*dexp(-vex2*r23)
do 1 i=1, 7
  f12(i)=f12(i-1)*bux12
  f13(i)=f13(i-1)*bux13
  f23(i)=f23(i-1)*bux23
1 continue
ener = 0.d0
der12 = 0.d0
der13 = 0.d0
der23 = 0.d0
do 2 l=1, 78
  if (i4(l).eq.1) then
    aux=f12(i1(l))*f13(i3(l))*f23(i2(l))
    dux12=i1(l)*f12(i1(l)-1)*f13(i3(l))*f23(i2(l))
    dux13=i3(l)*f12(i1(l))*f13(i3(l)-1)*f23(i2(l))
    dux23=i2(l)*f12(i1(l))*f13(i3(l))*f23(i2(l)-1)
  else
    aux1=f12(i1(l))*f13(i3(l))
    aux2=f12(i3(l))*f13(i1(l))
    aux=(aux1+aux2)*f23(i2(l))
    dux23=(aux1+aux2)*i2(l)*f23(i2(l)-1)
    dux1=i1(l)*f12(i1(l)-1)*f13(i3(l))
    dux2=i3(l)*f12(i3(l)-1)*f13(i1(l))
    dux12=(dux1+dux2)*f23(i2(l))
    dux1=i3(l)*f12(i1(l))*f13(i3(l)-1)
    dux2=i1(l)*f12(i3(l))*f13(i1(l)-1)
    dux13=(dux1+dux2)*f23(i2(l))
  endif
  ener=ener+cf(l)*aux
  der12=der12+cf(l)*dux12
  der13=der13+cf(l)*dux13
  der23=der23+cf(l)*dux23
2 continue
der(1)=der12*(1.d0-vex1*r12)*dexp(-vex1*r12)
der(2)=der13*(1.d0-vex1*r13)*dexp(-vex1*r13)
der(3)=der23*(1.d0-vex2*r23)*dexp(-vex2*r23)
return
end

```

## Fortran code 5. Analytical expression of the excited $2^3A'$ PES.

```
subroutine fit3d(r12,r13,r23,e,der)
  implicit real*8 (a-h,o-z)
  dimension der(3)
  call diat12(r12,e12,d12)
  call diat12(r13,e13,d13)
  call diat23(r23,e23,d23)
  call triabb(r12,r13,r23,e123,der)
  e=e12+e13+e23+e123
  der(1)=d12+der(1)
  der(2)=d13+der(2)
  der(3)=d23+der(3)
  return
end

!*****
*****
      subroutine diat12(r,ener,der)
!*****
*****
!*      This subroutine computes the energies of a diatomic
potential
!*      fitted to      59 points
!*      rms =      0.11209395 kcal/mol
!*      emax =      0.23877383 kcal/mol
!*****
*****
      implicit real*8 (a-h,o-z)
      dimension cf( 11)
      data cf( 1)/0.1619944524011548D+01/
      data cf( 2)/-.6469801592030440D+00/
      data cf( 3)/-.1951243216250550D+02/
      data cf( 4)/0.7453430357212217D+03/
      data cf( 5)/-.1565854316752900D+05/
      data cf( 6)/0.2065658489679768D+06/
      data cf( 7)/-.1746990835027075D+07/
      data cf( 8)/0.9419126493665289D+07/
      data cf( 9)/-.3122979702528037D+08/
      data cf(10)/0.5793801158781502D+08/
      data cf(11)/-.4600057711331255D+08/
      e0=0.0000000000000000D+00
      der=0.d0
      vex1=0.1364941401920840D+01
      vex2=0.6764450547918991D+00
      aux = 1.d0/r
      bux = dexp(-vex2*r)*aux
      cux = dexp(-vex1*r)
      ener=e0+cf(1)*bux
      dux=1.d0
      eux=r*cux
      do 1 i=2, 11
        der=der+(i-1)*cf(i)*dux
        dux=dux*eux
```

```

ener=ener+cf(i)*dux
1 continue
der=der*(1.d0-vex1*r)*cux
der=der-cf(1)*(vex2+aux)*bux
return
end
!*****
*****
subroutine diat23(r,ener,der)
!*****
*****
!* This subroutine computes the energies of a diatomic
potential
!* fitted to 72 points
!* rms = 0.01501997 kcal/mol
!* emax = 0.05458411 kcal/mol
!*****
*****
implicit real*8 (a-h,o-z)
dimension cf( 11)
data cf( 1)/0.1022297382480432D+01/
data cf( 2)/-.7672738217416850D+00/
data cf( 3)/0.4264477545997991D+01/
data cf( 4)/-.4708724852634353D+02/
data cf( 5)/0.4641581157278750D+03/
data cf( 6)/-.3259025457886833D+04/
data cf( 7)/0.1533491920089703D+05/
data cf( 8)/-.4691860547744167D+05/
data cf( 9)/0.8921625418895467D+05/
data cf(10)/-.9551643860478746D+05/
data cf(11)/0.4391295772917960D+05/
e0=0.0000000000000000D+00
der=0.d0
vex1=0.9798843955181915D+00
vex2=0.1654128603889533D+01
aux = 1.d0/r
bux = dexp(-vex2*r)*aux
cux = dexp(-vex1*r)
ener=e0+cf(1)*bux
dux=1.d0
eux=r*cux
do 1 i=2, 11
der=der+(i-1)*cf(i)*dux
dux=dux*eux
ener=ener+cf(i)*dux
1 continue
der=der*(1.d0-vex1*r)*cux
der=der-cf(1)*(vex2+aux)*bux
return
end
!*****
*****
subroutine triabb(r12,r13,r23,ener,der)
!*****
*****
!* This subroutine computes the energies of a 3D PES
!* for the ABB system class fitted to 49478 points
!* rms = 1.74367898 kcal/mol

```

```

!*      emax =      24.36870975 kcal/mol
!*****
implicit real*8(a-h,o-z)
dimension i1( 55),i2( 55),i3( 55),i4( 55),cf(
55)
dimension f12(0: 6),f13(0: 6),f23(0: 6)
dimension der(3)
data cf( 1)/0.5232552146888330D+00/
data i1( 1)/ 1/,i2( 1)/ 1/,i3( 1)/ 0/,i4( 1)/ 2/
data cf( 2)/-.2132564933936615D+01/
data i1( 2)/ 1/,i2( 2)/ 0/,i3( 2)/ 1/,i4( 2)/ 1/
data cf( 3)/0.2045443743872815D+02/
data i1( 3)/ 1/,i2( 3)/ 1/,i3( 3)/ 1/,i4( 3)/ 1/
data cf( 4)/-.6908645545976043D+01/
data i1( 4)/ 2/,i2( 4)/ 1/,i3( 4)/ 0/,i4( 4)/ 2/
data cf( 5)/0.7609375456584592D+01/
data i1( 5)/ 2/,i2( 5)/ 0/,i3( 5)/ 1/,i4( 5)/ 2/
data cf( 6)/-.1370415006709562D+02/
data i1( 6)/ 0/,i2( 6)/ 2/,i3( 6)/ 1/,i4( 6)/ 2/
data cf( 7)/-.1794576207481303D+02/
data i1( 7)/ 2/,i2( 7)/ 1/,i3( 7)/ 1/,i4( 7)/ 2/
data cf( 8)/-.2224118551251306D+03/
data i1( 8)/ 1/,i2( 8)/ 2/,i3( 8)/ 1/,i4( 8)/ 1/
data cf( 9)/0.9660061038804263D+02/
data i1( 9)/ 2/,i2( 9)/ 2/,i3( 9)/ 0/,i4( 9)/ 2/
data cf( 10)/-.1190490751503718D+02/
data i1( 10)/ 2/,i2( 10)/ 0/,i3( 10)/ 2/,i4( 10)/ 1/
data cf( 11)/-.8712287579247945D+00/
data i1( 11)/ 3/,i2( 11)/ 1/,i3( 11)/ 0/,i4( 11)/ 2/
data cf( 12)/-.1816337192585021D+02/
data i1( 12)/ 3/,i2( 12)/ 0/,i3( 12)/ 1/,i4( 12)/ 2/
data cf( 13)/0.1442031705863976D+03/
data i1( 13)/ 0/,i2( 13)/ 3/,i3( 13)/ 1/,i4( 13)/ 2/
data cf( 14)/0.2508259215339758D+01/
data i1( 14)/ 2/,i2( 14)/ 2/,i3( 14)/ 1/,i4( 14)/ 2/
data cf( 15)/0.5617585522567757D+03/
data i1( 15)/ 2/,i2( 15)/ 1/,i3( 15)/ 2/,i4( 15)/ 1/
data cf( 16)/-.3480463034301471D+03/
data i1( 16)/ 3/,i2( 16)/ 1/,i3( 16)/ 1/,i4( 16)/ 2/
data cf( 17)/0.1506039256688979D+04/
data i1( 17)/ 1/,i2( 17)/ 3/,i3( 17)/ 1/,i4( 17)/ 1/
data cf( 18)/0.5610334915719325D+02/
data i1( 18)/ 3/,i2( 18)/ 2/,i3( 18)/ 0/,i4( 18)/ 2/
data cf( 19)/0.8043831322760178D+01/
data i1( 19)/ 3/,i2( 19)/ 0/,i3( 19)/ 2/,i4( 19)/ 2/
data cf( 20)/-.7557649494536001D+03/
data i1( 20)/ 0/,i2( 20)/ 3/,i3( 20)/ 2/,i4( 20)/ 2/
data cf( 21)/0.1032309532000700D+03/
data i1( 21)/ 4/,i2( 21)/ 1/,i3( 21)/ 0/,i4( 21)/ 2/
data cf( 22)/0.3205644178267772D+02/
data i1( 22)/ 4/,i2( 22)/ 0/,i3( 22)/ 1/,i4( 22)/ 2/
data cf( 23)/-.6696710334284481D+03/
data i1( 23)/ 0/,i2( 23)/ 4/,i3( 23)/ 1/,i4( 23)/ 2/
data cf( 24)/-.2306731096968502D+04/
data i1( 24)/ 2/,i2( 24)/ 2/,i3( 24)/ 2/,i4( 24)/ 1/
data cf( 25)/0.1546621552661791D+04/

```

data i1( 25)/ 3/,i2( 25)/ 2/,i3( 25)/ 1/,i4( 25)/ 2/  
data cf( 26)/-.3386214366580460D+03/  
data i1( 26)/ 3/,i2( 26)/ 1/,i3( 26)/ 2/,i4( 26)/ 2/  
data cf( 27)/0.5316523681797708D+02/  
data i1( 27)/ 1/,i2( 27)/ 3/,i3( 27)/ 2/,i4( 27)/ 2/  
data cf( 28)/-.1767078512137205D+03/  
data i1( 28)/ 3/,i2( 28)/ 3/,i3( 28)/ 0/,i4( 28)/ 2/  
data cf( 29)/-.6586162862171294D+01/  
data i1( 29)/ 3/,i2( 29)/ 0/,i3( 29)/ 3/,i4( 29)/ 1/  
data cf( 30)/0.4845255701730322D+03/  
data i1( 30)/ 4/,i2( 30)/ 1/,i3( 30)/ 1/,i4( 30)/ 2/  
data cf( 31)/-.5539778329748754D+04/  
data i1( 31)/ 1/,i2( 31)/ 4/,i3( 31)/ 1/,i4( 31)/ 1/  
data cf( 32)/-.4664277361965960D+03/  
data i1( 32)/ 4/,i2( 32)/ 2/,i3( 32)/ 0/,i4( 32)/ 2/  
data cf( 33)/-.3007657670842094D+00/  
data i1( 33)/ 4/,i2( 33)/ 0/,i3( 33)/ 2/,i4( 33)/ 2/  
data cf( 34)/0.3155434521205943D+04/  
data i1( 34)/ 0/,i2( 34)/ 4/,i3( 34)/ 2/,i4( 34)/ 2/  
data cf( 35)/-.1734768098511554D+03/  
data i1( 35)/ 5/,i2( 35)/ 1/,i3( 35)/ 0/,i4( 35)/ 2/  
data cf( 36)/-.3009097123735941D+02/  
data i1( 36)/ 5/,i2( 36)/ 0/,i3( 36)/ 1/,i4( 36)/ 2/  
data cf( 37)/0.1109921345503035D+04/  
data i1( 37)/ 0/,i2( 37)/ 5/,i3( 37)/ 1/,i4( 37)/ 2/  
data cf( 38)/0.5383565023020273D+03/  
data i1( 38)/ 3/,i2( 38)/ 2/,i3( 38)/ 2/,i4( 38)/ 2/  
data cf( 39)/0.4117941364127629D+04/  
data i1( 39)/ 2/,i2( 39)/ 3/,i3( 39)/ 2/,i4( 39)/ 1/  
data cf( 40)/-.3326947746341464D+04/  
data i1( 40)/ 3/,i2( 40)/ 3/,i3( 40)/ 1/,i4( 40)/ 2/  
data cf( 41)/-.6540938393755469D+03/  
data i1( 41)/ 3/,i2( 41)/ 1/,i3( 41)/ 3/,i4( 41)/ 1/  
data cf( 42)/-.6773735908002590D+03/  
data i1( 42)/ 4/,i2( 42)/ 2/,i3( 42)/ 1/,i4( 42)/ 2/  
data cf( 43)/0.6249265063642952D+03/  
data i1( 43)/ 4/,i2( 43)/ 1/,i3( 43)/ 2/,i4( 43)/ 2/  
data cf( 44)/0.1195094570966182D+04/  
data i1( 44)/ 1/,i2( 44)/ 4/,i3( 44)/ 2/,i4( 44)/ 2/  
data cf( 45)/0.1244824287782791D+04/  
data i1( 45)/ 4/,i2( 45)/ 3/,i3( 45)/ 0/,i4( 45)/ 2/  
data cf( 46)/0.1634022377657989D+01/  
data i1( 46)/ 4/,i2( 46)/ 0/,i3( 46)/ 3/,i4( 46)/ 2/  
data cf( 47)/-.9154233058144278D+03/  
data i1( 47)/ 0/,i2( 47)/ 4/,i3( 47)/ 3/,i4( 47)/ 2/  
data cf( 48)/-.4163481478825207D+03/  
data i1( 48)/ 5/,i2( 48)/ 1/,i3( 48)/ 1/,i4( 48)/ 2/  
data cf( 49)/0.3704490069254743D+04/  
data i1( 49)/ 1/,i2( 49)/ 5/,i3( 49)/ 1/,i4( 49)/ 1/  
data cf( 50)/0.1849344384270341D+03/  
data i1( 50)/ 5/,i2( 50)/ 2/,i3( 50)/ 0/,i4( 50)/ 2/  
data cf( 51)/-.7023057027022565D+00/  
data i1( 51)/ 5/,i2( 51)/ 0/,i3( 51)/ 2/,i4( 51)/ 2/  
data cf( 52)/-.2919012209123642D+04/  
data i1( 52)/ 0/,i2( 52)/ 5/,i3( 52)/ 2/,i4( 52)/ 2/  
data cf( 53)/0.1245799420454103D+03/



```

data i1( 53)/ 6/,i2( 53)/ 1/,i3( 53)/ 0/,i4( 53)/ 2/
data cf( 54)/0.1044087866747009D+02/
data i1( 54)/ 6/,i2( 54)/ 0/,i3( 54)/ 1/,i4( 54)/ 2/
data cf( 55)/-.6395813155240017D+02/
data i1( 55)/ 0/,i2( 55)/ 6/,i3( 55)/ 1/,i4( 55)/ 2/
vex1=0.4249906679652683D+00
vex2=0.1124660677681497D+01
f12(0)=1.d0
f13(0)=1.d0
f23(0)=1.d0
bux12=r12*dexp(-vex1*r12)
bux13=r13*dexp(-vex1*r13)
bux23=r23*dexp(-vex2*r23)
do 1 i=1, 6
    f12(i)=f12(i-1)*bux12
    f13(i)=f13(i-1)*bux13
    f23(i)=f23(i-1)*bux23
1 continue
ener = 0.d0
der12 = 0.d0
der13 = 0.d0
der23 = 0.d0
do 2 l=1, 55
    if (i4(l).eq.1) then
        aux=f12(i1(l))*f13(i3(l))*f23(i2(l))
        dux12=i1(l)*f12(i1(l)-1)*f13(i3(l))*f23(i2(l))
        dux13=i3(l)*f12(i1(l))*f13(i3(l)-1)*f23(i2(l))
        dux23=i2(l)*f12(i1(l))*f13(i3(l))*f23(i2(l)-1)
    else
        aux1=f12(i1(l))*f13(i3(l))
        aux2=f12(i3(l))*f13(i1(l))
        aux=(aux1+aux2)*f23(i2(l))
        dux23=(aux1+aux2)*i2(l)*f23(i2(l)-1)
        dux1=i1(l)*f12(i1(l)-1)*f13(i3(l))
        dux2=i3(l)*f12(i3(l)-1)*f13(i1(l))
        dux12=(dux1+dux2)*f23(i2(l))
        dux1=i3(l)*f12(i1(l))*f13(i3(l)-1)
        dux2=i1(l)*f12(i3(l))*f13(i1(l)-1)
        dux13=(dux1+dux2)*f23(i2(l))
    endif
    ener=ener+cf(l)*aux
    der12=der12+cf(l)*dux12
    der13=der13+cf(l)*dux13
    der23=der23+cf(l)*dux23
2 continue
der(1)=der12*(1.d0-vex1*r12)*dexp(-vex1*r12)
der(2)=der13*(1.d0-vex1*r13)*dexp(-vex1*r13)
der(3)=der23*(1.d0-vex2*r23)*dexp(-vex2*r23)
return
end

```

## Fortran code 6. Analytical expression of the excited $1^3A''$ PES.

```
subroutine fit3d(r12,r13,r23,e,der)
implicit real*8 (a-h,o-z)
dimension der(3)
call diat12(r12,e12,d12)
call diat12(r13,e13,d13)
call diat23(r23,e23,d23)
call triabb(r12,r13,r23,e123,der)
e=e12+e13+e23+e123
der(1)=d12+der(1)
der(2)=d13+der(2)
der(3)=d23+der(3)
return
end
*****
*****
subroutine diat12(r,ener,der)
*****
*****
* This subroutine computes the energies of a diatomic
potential
* fitted to 54 points
* rms = 0.05934373 kcal/mol
* emax = 0.18579253 kcal/mol
*****
*****
implicit real*8 (a-h,o-z)
dimension cf( 8)
data cf( 1)/0.1059103575538977D+01/
data cf( 2)/0.4444171059442829D-01/
data cf( 3)/-.1785173596330693D+01/
data cf( 4)/0.1389970934818910D+02/
data cf( 5)/-.5079171234946122D+02/
data cf( 6)/0.1003419256661402D+03/
data cf( 7)/-.1024364263643563D+03/
data cf( 8)/0.4248015432175057D+02/
e0=0.0000000000000000D+00
der=0.d0
vex1=0.5543393878842004D+00
vex2=0.6299316154588180D+00
aux = 1.d0/r
bux = dexp(-vex2*r)*aux
cux = dexp(-vex1*r)
ener=e0+cf(1)*bux
dux=1.d0
eux=r*cux
do 1 i=2, 8
der=der+(i-1)*cf(i)*dux
dux=dux*eux
ener=ener+cf(i)*dux
1 continue
der=der*(1.d0-vex1*r)*cux
```

```

    der=der-cf(1)*(vex2+aux)*bux
    return
end
*****
*****
    subroutine diat23(r,ener,der)
*****
*****
*       This subroutine computes the energies of a diatomic
potential
*       fitted to      72 points
*       rms =         0.02751660 kcal/mol
*       emax =         0.09657713 kcal/mol
*****
*****
    implicit real*8 (a-h,o-z)
    dimension cf( 13)
    data cf( 1)/0.1025911060320943D+01/
    data cf( 2)/-.1175547229303214D+01/
    data cf( 3)/0.2024485840006341D+02/
    data cf( 4)/-.5301786773678648D+03/
    data cf( 5)/0.9979263846994540D+04/
    data cf( 6)/-.1253260333380152D+06/
    data cf( 7)/0.1061566466628005D+07/
    data cf( 8)/-.6141958907006282D+07/
    data cf( 9)/0.2428846391170872D+08/
    data cf(10)/-.6452782338342221D+08/
    data cf(11)/0.1100718875325924D+09/
    data cf(12)/-.1088701923322061D+09/
    data cf(13)/0.4744897801219261D+08/
    e0=0.0000000000000000D+00
    der=0.d0
    vex1=0.1035656359561501D+01
    vex2=0.1645518387572454D+01
    aux = 1.d0/r
    bux = dexp(-vex2*r)*aux
    cux = dexp(-vex1*r)
    ener=e0+cf(1)*bux
    dux=1.d0
    eux=r*cux
    do 1 i=2, 13
        der=der+(i-1)*cf(i)*dux
        dux=dux*eux
        ener=ener+cf(i)*dux
1 continue
    der=der*(1.d0-vex1*r)*cux
    der=der-cf(1)*(vex2+aux)*bux
    return
end
*****
*****
    subroutine triabb(r12,r13,r23,ener,der)
*****
*****
*       This subroutine computes the energies of a 3D PES
*       for the ABB system class fitted to **** points
*       rms =         0.95185471 kcal/mol
*       emax =         14.53662118 kcal/mol

```

```

*****
implicit real*8(a-h,o-z)
dimension i1( 55),i2( 55),i3( 55),i4( 55),cf(
55)
dimension f12(0: 6),f13(0: 6),f23(0: 6)
dimension der(3)
data cf( 1)/-.3117602534941859D+01/
data i1( 1)/ 1/,i2( 1)/ 1/,i3( 1)/ 0/,i4( 1)/ 2/
data cf( 2)/-.6475486874455906D+02/
data i1( 2)/ 1/,i2( 2)/ 0/,i3( 2)/ 1/,i4( 2)/ 1/
data cf( 3)/0.1313237768899171D+03/
data i1( 3)/ 1/,i2( 3)/ 1/,i3( 3)/ 1/,i4( 3)/ 1/
data cf( 4)/0.3433871915109034D+02/
data i1( 4)/ 2/,i2( 4)/ 1/,i3( 4)/ 0/,i4( 4)/ 2/
data cf( 5)/0.3704860445265228D+03/
data i1( 5)/ 2/,i2( 5)/ 0/,i3( 5)/ 1/,i4( 5)/ 2/
data cf( 6)/0.2343385052793412D+01/
data i1( 6)/ 0/,i2( 6)/ 2/,i3( 6)/ 1/,i4( 6)/ 2/
data cf( 7)/-.6660729001318131D+03/
data i1( 7)/ 2/,i2( 7)/ 1/,i3( 7)/ 1/,i4( 7)/ 2/
data cf( 8)/-.1083696590547858D+03/
data i1( 8)/ 1/,i2( 8)/ 2/,i3( 8)/ 1/,i4( 8)/ 1/
data cf( 9)/-.2243174000178677D+02/
data i1( 9)/ 2/,i2( 9)/ 2/,i3( 9)/ 0/,i4( 9)/ 2/
data cf( 10)/0.2740987234787260D+04/
data i1( 10)/ 2/,i2( 10)/ 0/,i3( 10)/ 2/,i4( 10)/ 1/
data cf( 11)/-.1490161829633056D+03/
data i1( 11)/ 3/,i2( 11)/ 1/,i3( 11)/ 0/,i4( 11)/ 2/
data cf( 12)/-.4201941535126671D+04/
data i1( 12)/ 3/,i2( 12)/ 0/,i3( 12)/ 1/,i4( 12)/ 2/
data cf( 13)/-.7687233351230540D+00/
data i1( 13)/ 0/,i2( 13)/ 3/,i3( 13)/ 1/,i4( 13)/ 2/
data cf( 14)/0.4931137377007766D+03/
data i1( 14)/ 2/,i2( 14)/ 2/,i3( 14)/ 1/,i4( 14)/ 2/
data cf( 15)/0.3643737382892776D+04/
data i1( 15)/ 2/,i2( 15)/ 1/,i3( 15)/ 2/,i4( 15)/ 1/
data cf( 16)/0.3744176347284027D+03/
data i1( 16)/ 3/,i2( 16)/ 1/,i3( 16)/ 1/,i4( 16)/ 2/
data cf( 17)/0.3652526884335006D+02/
data i1( 17)/ 1/,i2( 17)/ 3/,i3( 17)/ 1/,i4( 17)/ 1/
data cf( 18)/0.6997516359200217D+02/
data i1( 18)/ 3/,i2( 18)/ 2/,i3( 18)/ 0/,i4( 18)/ 2/
data cf( 19)/-.1633870892821139D+05/
data i1( 19)/ 3/,i2( 19)/ 0/,i3( 19)/ 2/,i4( 19)/ 2/
data cf( 20)/0.5794240507428085D+01/
data i1( 20)/ 0/,i2( 20)/ 3/,i3( 20)/ 2/,i4( 20)/ 2/
data cf( 21)/0.3370651151525071D+03/
data i1( 21)/ 4/,i2( 21)/ 1/,i3( 21)/ 0/,i4( 21)/ 2/
data cf( 22)/0.3478794751935005D+05/
data i1( 22)/ 4/,i2( 22)/ 0/,i3( 22)/ 1/,i4( 22)/ 2/
data cf( 23)/0.1166865850191706D+00/
data i1( 23)/ 0/,i2( 23)/ 4/,i3( 23)/ 1/,i4( 23)/ 2/
data cf( 24)/-.2049868365253393D+04/
data i1( 24)/ 2/,i2( 24)/ 2/,i3( 24)/ 2/,i4( 24)/ 1/
data cf( 25)/-.4452416147876128D+03/
data i1( 25)/ 3/,i2( 25)/ 2/,i3( 25)/ 1/,i4( 25)/ 2/

```

data cf( 26)/-.4764101748820569D+04/  
data il( 26)/ 3/,i2( 26)/ 1/,i3( 26)/ 2/,i4( 26)/ 2/  
data cf( 27)/-.1150955923453323D+03/  
data il( 27)/ 1/,i2( 27)/ 3/,i3( 27)/ 2/,i4( 27)/ 2/  
data cf( 28)/-.1077076033175925D+02/  
data il( 28)/ 3/,i2( 28)/ 3/,i3( 28)/ 0/,i4( 28)/ 2/  
data cf( 29)/0.9252327303094108D+04/  
data il( 29)/ 3/,i2( 29)/ 0/,i3( 29)/ 3/,i4( 29)/ 1/  
data cf( 30)/0.3014464452352719D+04/  
data il( 30)/ 4/,i2( 30)/ 1/,i3( 30)/ 1/,i4( 30)/ 2/  
data cf( 31)/-.5136658730245420D+01/  
data il( 31)/ 1/,i2( 31)/ 4/,i3( 31)/ 1/,i4( 31)/ 1/  
data cf( 32)/-.1044327970535752D+03/  
data il( 32)/ 4/,i2( 32)/ 2/,i3( 32)/ 0/,i4( 32)/ 2/  
data cf( 33)/0.6238506648739926D+05/  
data il( 33)/ 4/,i2( 33)/ 0/,i3( 33)/ 2/,i4( 33)/ 2/  
data cf( 34)/-.6646849212097356D+00/  
data il( 34)/ 0/,i2( 34)/ 4/,i3( 34)/ 2/,i4( 34)/ 2/  
data cf( 35)/-.3438400332369756D+03/  
data il( 35)/ 5/,i2( 35)/ 1/,i3( 35)/ 0/,i4( 35)/ 2/  
data cf( 36)/-.1377096626347440D+06/  
data il( 36)/ 5/,i2( 36)/ 0/,i3( 36)/ 1/,i4( 36)/ 2/  
data cf( 37)/-.7683073375143107D-02/  
data il( 37)/ 0/,i2( 37)/ 5/,i3( 37)/ 1/,i4( 37)/ 2/  
data cf( 38)/0.1865951776693740D+04/  
data il( 38)/ 3/,i2( 38)/ 2/,i3( 38)/ 2/,i4( 38)/ 2/  
data cf( 39)/0.2297528530755202D+03/  
data il( 39)/ 2/,i2( 39)/ 3/,i3( 39)/ 2/,i4( 39)/ 1/  
data cf( 40)/0.9879940894068504D+02/  
data il( 40)/ 3/,i2( 40)/ 3/,i3( 40)/ 1/,i4( 40)/ 2/  
data cf( 41)/0.1815290127581186D+05/  
data il( 41)/ 3/,i2( 41)/ 1/,i3( 41)/ 3/,i4( 41)/ 1/  
data cf( 42)/-.7985212461835086D+03/  
data il( 42)/ 4/,i2( 42)/ 2/,i3( 42)/ 1/,i4( 42)/ 2/  
data cf( 43)/-.9221399931516932D+04/  
data il( 43)/ 4/,i2( 43)/ 1/,i3( 43)/ 2/,i4( 43)/ 2/  
data cf( 44)/0.7126666406461260D+01/  
data il( 44)/ 1/,i2( 44)/ 4/,i3( 44)/ 2/,i4( 44)/ 2/  
data cf( 45)/0.1074825523882955D+02/  
data il( 45)/ 4/,i2( 45)/ 3/,i3( 45)/ 0/,i4( 45)/ 2/  
data cf( 46)/-.2827120730400022D+05/  
data il( 46)/ 4/,i2( 46)/ 0/,i3( 46)/ 3/,i4( 46)/ 2/  
data cf( 47)/0.4551484476535795D+00/  
data il( 47)/ 0/,i2( 47)/ 4/,i3( 47)/ 3/,i4( 47)/ 2/  
data cf( 48)/0.2632956318891673D+03/  
data il( 48)/ 5/,i2( 48)/ 1/,i3( 48)/ 1/,i4( 48)/ 2/  
data cf( 49)/0.2742462548440320D+00/  
data il( 49)/ 1/,i2( 49)/ 5/,i3( 49)/ 1/,i4( 49)/ 1/  
data cf( 50)/0.7996874138863559D+01/  
data il( 50)/ 5/,i2( 50)/ 2/,i3( 50)/ 0/,i4( 50)/ 2/  
data cf( 51)/-.5478780058918209D+05/  
data il( 51)/ 5/,i2( 51)/ 0/,i3( 51)/ 2/,i4( 51)/ 2/  
data cf( 52)/0.2957519645413219D-01/  
data il( 52)/ 0/,i2( 52)/ 5/,i3( 52)/ 2/,i4( 52)/ 2/  
data cf( 53)/0.4002986033461786D+03/  
data il( 53)/ 6/,i2( 53)/ 1/,i3( 53)/ 0/,i4( 53)/ 2/

```

data cf( 54)/0.1848322458531920D+06/
data i1( 54)/ 6/,i2( 54)/ 0/,i3( 54)/ 1/,i4( 54)/ 2/
data cf( 55)/0.1448007484531274D-03/
data i1( 55)/ 0/,i2( 55)/ 6/,i3( 55)/ 1/,i4( 55)/ 2/
vex1=0.1402660971663401D+01
vex2=0.5158151343666982D-01
f12(0)=1.d0
f13(0)=1.d0
f23(0)=1.d0
bux12=r12*dexp(-vex1*r12)
bux13=r13*dexp(-vex1*r13)
bux23=r23*dexp(-vex2*r23)
do 1 i=1, 6
    f12(i)=f12(i-1)*bux12
    f13(i)=f13(i-1)*bux13
    f23(i)=f23(i-1)*bux23
1 continue
ener = 0.d0
der12 = 0.d0
der13 = 0.d0
der23 = 0.d0
do 2 l=1, 55
    if (i4(l).eq.1) then
        aux=f12(i1(l))*f13(i3(l))*f23(i2(l))
        dux12=i1(l)*f12(i1(l)-1)*f13(i3(l))*f23(i2(l))
        dux13=i3(l)*f12(i1(l))*f13(i3(l)-1)*f23(i2(l))
        dux23=i2(l)*f12(i1(l))*f13(i3(l))*f23(i2(l)-1)
    else
        aux1=f12(i1(l))*f13(i3(l))
        aux2=f12(i3(l))*f13(i1(l))
        aux=(aux1+aux2)*f23(i2(l))
        dux23=(aux1+aux2)*i2(l)*f23(i2(l)-1)
        dux1=i1(l)*f12(i1(l)-1)*f13(i3(l))
        dux2=i3(l)*f12(i3(l)-1)*f13(i1(l))
        dux12=(dux1+dux2)*f23(i2(l))
        dux1=i3(l)*f12(i1(l))*f13(i3(l)-1)
        dux2=i1(l)*f12(i3(l))*f13(i1(l)-1)
        dux13=(dux1+dux2)*f23(i2(l))
    endif
    ener=ener+cf(l)*aux
    der12=der12+cf(l)*dux12
    der13=der13+cf(l)*dux13
    der23=der23+cf(l)*dux23
2 continue
der(1)=der12*(1.d0-vex1*r12)*dexp(-vex1*r12)
der(2)=der13*(1.d0-vex1*r13)*dexp(-vex1*r13)
der(3)=der23*(1.d0-vex2*r23)*dexp(-vex2*r23)
return
end

```
